# Supplementary material for: The effects of isoprene and NO x on secondary organic aerosols formed through reversible and irreversible uptake to aerosol water
Source: Copernicus journal article supplement (doi:10.5194/acp-2017-702), 2017-08-17
Supplement: Supplementary file [file acp-2017-702-AC3-supplement.pdf]

## Response to Reviews

We thank the reviewers for their detailed comments and helpful suggestions. We have addressed each comment below, with the Referee comment in bold italicized text, our response in plain text, and any manuscript changes noted in red text. In addition, the revised manuscript with changes marked up has been attached to the end of our response to Referee 3.

### Anonymous Referee #3

#### General comments:

*This article examines the influence of NO<sub>x</sub> on the reversibility of aqueous SOA. The paper analyzed the irreversible and reversible water-soluble organic carbon (WSOC) in the particle phase, as well as WSOC in the gas phase from a site in the Eastern US. By correlating the gas phase and particle phase WSOC with isoprene concentration measured at a nearby site (~20 km away), the author believes that IEPOX uptake is responsible for the reversible aqueous SOA. By correlating the NO<sub>x</sub>/isoprene ratio vs. the percentage of reversible aqueous SOA of total particle phase WSOC, the author suggests that low NO<sub>x</sub>/isoprene ratios seem to enhance reversible aqueous SOA formation, which agrees with the author's assumption that IEPOX is the main reason for reversible aqSOA formed in late spring and summer.*

*This study provides a nice perspective of how reversible WSOC could affect the SOA budget and how drying the aerosol before performing field measurement could neglect reversible WSOC. The work performed to attribute the sources of such reversible WSOC by performing a time lag correlation on the isoprene concentration is interesting, but the lack of further analysis on the molecular composition of the gas and particle phase WSOC weakens the conclusion.*

*Overall, this article provides a unique perspective on the importance of WSOC in SOA with enough scientific content and novelty to be published in ACP. However, the conclusion that IEPOX is the likely cause of reversible WSOC in aqSOA is not strong enough and the logic between sentences in some paragraphs is not clear. The author needs to address the following issues and refine the wording before being published in ACP.:*

*1. The sampling site of WSOC (Baltimore) is ~20 km away from the site sampling isoprene and NO<sub>x</sub> (Essex site), so whether the Essex site can be representative of the Baltimore site is a questionable part of this study, especially when the Baltimore site is heavily influenced by anthropogenic emissions and the author showed up to 11 hour lag comparison between the two sites. Back trajectory data would be better to use in this paper to justify the result, in order to (1) either prove that Baltimore is downwind of the Essex Site, (2) or to filter out those data when Baltimore is not downwind of the Essex site.*

We agree with the Referee that more discussion is needed to justify our use of data from different sites (Referee #1 had a similar comment). We have added the following discussion to Section 2 to support our methods: “**A key assumption employed in this analysis is that the WSOC measurements made at UMBC are representative of conditions at Essex, the location of**

the NO<sub>x</sub> and isoprene measurements. Aerosol concentrations in the Baltimore-Washington region are spatially uniform over tens of kilometers (Beyersdorf et al., 2016). Further, WSOC<sub>p</sub> concentrations exhibit small spatial variations across urban-to-rural gradients during the summertime (Weber et al., 2007). These prior analyses showed that aerosol concentrations, and in particular WSOC, were not dependent on wind direction. Isoprene emissions in the eastern U.S. are regional in nature, due to the expansive coverage of broadleaf forests (Guenther et al., 2012; Pye et al., 2013). NO<sub>x</sub> emissions are spatially segregated from those of isoprene, and are far more localized. However, the isoprene-NO<sub>x</sub> chemical regime (high- or low-NO<sub>x</sub>) in the eastern U.S. is generally well-represented with model resolution of 28 x 28 km, suggesting that the chemistry occurring on small scales, such as in individual power plant plumes, does not significantly affect the regional isoprene-NO<sub>x</sub> regime (Yu et al., 2016). NO<sub>x</sub> concentrations at Essex (20 km ENE of UMBC) and HU-Beltsville (35 km SSW of UMBC) are strongly correlated (R = 0.89, Fig. S6), likely due to the overwhelming contribution of mobile source emissions along the heavily-traveled I-95 corridor to the region (Anderson et al., 2014). Together, this supports our analysis into the effects of isoprene and NO<sub>x</sub> on reversible aqSOA using the measurements described above.”

***2. It is difficult to make a strong argument that IEPOX is the main reason for the reversible WSOC in the particle phase without chemical characterization. Other BVOCs (such as monoterpenes) can also form water-soluble components that were shown to enhance SOA mass at high RH (Prisle et al., 2010), and their reaction mechanisms are also sensitive to NO<sub>x</sub> concentration (Wildt et al.). Even though IEPOX may seem to be a more likely compound for reversible aqSOA for this study, the author needs to provide stronger evidence to rule out other possibilities, such as a correlation plot between particle WSOC vs. time lagged monoterpene concentration.***

The Referee brings up an excellent point (also made by Referee 1). We have added an explanation for why monoterpene oxidation is not likely contributing to our observations of evaporated WSOC<sub>p</sub>. The following paragraph is now at the beginning of section 3.3: “During the late spring, the onset of reversible aqSOA formation corresponds to the dramatic increase in isoprene concentrations (Fig. 2). Observations of the Aerodyne aerosol mass spectrometer (AMS) IEPOX factor (Budisulistiorini et al., 2016) and chemical markers for isoprene SOA (Kleindienst et al., 2007) show similarly sharp transitions in the spring and fall in the southeastern U.S. The highest reversible aqSOA levels were observed during the summer when isoprene emissions were at their maximum. Other VOCs, such as monoterpenes, also contribute to SOA in the eastern U.S. (Xu et al., 2015), but monoterpene and isoprene SOA tracers show distinctly different temporal patterns in the eastern U.S. Isoprene SOA peaks during summer, but monoterpene SOA tracers exhibit similar (or lower) concentrations in the summer compared to other seasons (Ding et al., 2008; Kleindienst et al., 2007). Further, monoterpene SOA is typically associated with semi-volatile and less-oxidized OA factors in the AMS analysis (Jimenez et al., 2009; Xu et al., 2015), but WSOC<sub>p</sub> is poorly correlated with these factors (Timonen et al., 2013; Xu et al., 2016). On the basis of these prior studies, and the results in Figures 1 and 2, we attribute the reversible aqSOA in Baltimore to isoprene.”

**3. Page 3, line 7, the author listed the ACP paper by Chan Miller et al. (2017) to show that glyoxal is formed in both low- and high- NO<sub>x</sub> pathways while IEPOX is mainly formed in the low NO<sub>x</sub> pathway. Therefore the author states that the correlation between NO<sub>x</sub>/isoprene can be attributed to IEPOX. But, the yield of glyoxal in high and low NO<sub>x</sub> conditions are different. Chan Miller et al. shows in his paper (Figure 2) that glyoxal formed from isoprene oxidation has a higher yield at low NO<sub>x</sub> condition compared with a high NO<sub>x</sub> condition. Therefore, I believe the increase of reversible aqSOA could be at least partially attributed to glyoxal. The author needs to specify all these possibilities in the paper rather than attributing the reversible aqSOA solely on IEPOX. The conclusion in the abstract as well as throughout the paper is too strong and needs to be revised.**

The modeling study of Chan Miller et al. (2017) predicts that, in the eastern U.S. during summer, glyoxal production from isoprene is almost equal between high- and low-NO<sub>x</sub> pathways (see their Figure 1 with quantitative contributions from each pathway corresponding to the eastern U.S. in June and July). We have clarified the text so that it now reads: “**During the summer, model predictions suggest that glyoxal production from isoprene occurs almost equally through low- and high-NO<sub>x</sub> pathways in the eastern U.S. (Chan Miller et al., 2017).**” However, we agree with the Referee’s comment that stronger justification is needed to support the explanation that IEPOX is largely responsible for our observed reversible aqSOA. We have added substantial discussion related to this point (see our response to comments #2, #13, and #14).

**4. Besides comparing  $WSOC_{p,dry}/WSOC_p$  with isoprene concentration, has the author studied the influence of ambient humidity on  $WSOC_{p,dry}/WSOC_p$ ?**

Yes, we have looked at the influence of ambient humidity on  $WSOC_{p,dry}/WSOC_p$  in the fall (El-Sayed et al., 2015) and during the summer (El-Sayed et al., 2016) and the full seasonal characterization is detailed in a paper in preparation.

**5. Moreover, from TableS1, it seems that when ambient RH=80%, the RHs of the samples passed through the silica gel dryer were consistently higher in the summer time than in the winter time. What are the reasons and would that cause artifacts of the results?**

This is probably due to differences in the absolute humidity levels during both seasons. With the  $WSOC_p/WSOC_{p,dry}$  system, our goal is not to dry the particles completely. Rather, it is to mimic the drying that particles typically undergo near the surface as a result of ambient meteorological variations. The dryer does a reasonable job of this: during the summer, the RH through the dryer suggests that the particles lose most ALW but do not dry completely (i.e., at RH of 35 – 40% there is still ALW). During the winter, however, the RH through the dryer suggests that the particles are dried completely. This is supported by an ambient study at a similar location, where it was observed that particles during the summer almost always contained some water (even at the lowest ambient RH levels), while particles during the winter were often dry (Khlystov et al., 2005). This has been added to the text in the Supplement: “**Note, differences in the RH through the dryer are likely due to differences in absolute humidity levels within each season.**”

**6. Because IEPOX usually undergoes reactive uptake with high acidity aerosols (Gaston et al., 2014; Riedel et al., 2015), people have been assuming that isoprene-derived SOA is not very important in low acidity aerosols. However, the result presented in this study shows the importance of isoprene-derived SOA even for low acidity aerosol particles, especially when there is an amount of liquid water in the aerosol so IEPOX can have reversible partitioning. The author should probably talk about the importance of this aspect in the atmospheric implication section as well.**

Based on several recent studies (Budisulistiorini et al., 2016; Guo et al., 2017; 2016; 2015; Weber et al., 2016; Xu et al., 2015), we do not believe that our results offer a different perspective on the role of particle acidity in forming isoprene SOA. These studies suggest that (1) particles in the eastern U.S. are quite acidic ( $\text{pH} < 2$ ) most of the time, and (2) the pH is low enough that acidity is not likely a limiting factor for IEPOX SOA formation in the eastern U.S. What is quite interesting is that it appears isoprene forms reversible SOA, even in the presence of acidic particles. We have added the following discussion about this point: “In addition to  $\text{NO}_x$ , sulfate also strongly affects SOA formation from isoprene through its separate contributions to ALW, particle acidity, and aqueous chemistry (Nguyen et al., 2014; Surratt et al., 2010; Xu et al., 2015). Laboratory studies have not yet elucidated the role of each factor in the reversibility of isoprene SOA, and we do not have sufficient sulfate data to characterize such effects with our analysis. However, it is worth noting that particle acidity is not likely a factor in the relative split between reversible and irreversible aqSOA formed from isoprene. Studies predict that particles in the eastern U.S. are highly acidic throughout the year (Battaglia et al., 2017; Guo et al., 2016; Guo et al., 2015; Weber et al., 2016), and acidity is not a limiting factor in isoprene SOA formation during the summer (Budisulistiorini et al., 2016; Xu et al., 2015). The implication from our observations is that reversible aqSOA from isoprene forms even in the presence of such persistently acidic particles. This further questions the treatment of isoprene SOA as an irreversible uptake process in models.”

### **Minor Comments**

**7. Page 1, line 31. Oxford comma is recommended here after glyoxal.**

Comma has been added, as suggested.

**8. Page 2, line 1. Besides all the literature the author listed here, I believe Riedel et al., (ES&T Letters, 2015) should also be included as well when talking about reactive uptake of IEPOX.**

We have added the Riedel et al. (2015) reference, as suggested.

**9. Page 2, line 14. The author used an incorrect example here. Oligomerization is a non-reversible process, as also shown in De Haan et al. that the author cited.**

We respectfully disagree with the Referee on this point. We agree that De Haan et al. (2009) show oligomerization pathways that are irreversible (e.g., their Scheme 1). However, they also observe significant evaporation of glyoxal and methylglyoxal from aqueous droplets that undergo drying. This was likely due to hydrated forms of each compound, as well as dimers and trimers formed from self-reactions. See also the recent review article on aqSOA by McNeill (2015) which describes oligomerization of glyoxal and methylglyoxal as reversible.

**10. Page 2, line 15. Oxford comma is recommended here after inorganics.**

Comma has been added, as suggested.

**11. Page 3, line 25. Because the author performed the experiment using a home-built mist chamber, is there any characterization of this mist chamber, such as recovery efficiency of the gas phase species? Such information would help the reader in understanding the performance of the mist chamber and also error bar of the measurement.**

We have performed a detailed characterization of the MC, which is the topic of a manuscript in preparation. We cannot reference this work, in accord with ACP guidelines. However, this MC has been used in many prior studies (e.g., (Anderson et al., 2008; El-Sayed et al., 2016; 2015; Ervens et al., 2011; Hennigan et al., 2008; Hennigan et al., 2009; Zhang et al., 2012). In both of the El-Sayed et al. papers, we present experimental schematics and include detailed discussion of the MC, including LODs and measurement uncertainty. We have also added the following sentence to the Methods section: “**The MC and WSOC<sub>g</sub> measurement have been detailed elsewhere (El-Sayed et al., 2016; 2015).**”

**12. Page 5, line 10. Has the author compared the ambient RH of summer and winter times? Does ambient RH have an effect on WSOC<sub>p, dry</sub>/WSOC<sub>p</sub>**

Ambient RH does have an effect on WSOC<sub>p, dry</sub>/WSOC<sub>p</sub> during summer (El-Sayed et al., 2016) and late spring, but not during other seasons (El-Sayed et al., 2015). The ambient RH was generally similar across the seasons; this is a point of discussion in our manuscript in preparation.

**13. Page 5, line 33-34. As previously mentioned, it would be better if the author could compare other BVOCs with WSOC obtained from this study to rule out the possibilities of other BVOCs producing WSOC.**

See our response to comment #2 above.

**14. Page 7, line 21. Has the author examined the relationship between ozone and**

***WSOC<sub>p</sub>? If there is a correlation, then it means other BVOCs can also contribute to WSOC<sub>p</sub> as well.***

See our response to comment #2 above.

***15. Page 7, line 33-35. The sentence “If isoprene is indeed. . .” seems to be out of the place here because it does not go with the sentence below logically. The author can either elaborate more on this sentence or delete this sentence.***

We agree with the Referee’s suggestion and have moved the order of these sentences so they now read: “If isoprene is indeed associated with the evaporated WSOC<sub>p</sub> that we observed during the late spring and summer, then a logical question is why we did not observe this phenomenon during measurements throughout September (Fig. 1, El-Sayed et al. (2015)). Although isoprene emissions decrease dramatically during September, there are still periods with elevated concentrations.”

***16. Page 8, line 22. AOD was not defined previously. Please define.***

AOD has been defined.

***17. Page 8, line 23-line 36. This paragraph is pretty confusing because there are different concepts and ideas intertwined with each other. The author can talk about the results in Fig. 1 first, and then mention Liu et al. and Riva et al., and lastly talk about McNeill et al.***

We have revised this entire paragraph for clarity so that it now reads: “The effect of water evaporation on WSOC<sub>p</sub> also has important implications for the representation of SOA formation in models. The results in Fig. 1 show that ≈10 to 15 % of the total WSOC<sub>p</sub> evaporates with drying during the late spring and summer, on average. This suggests that the fraction of aqSOA that is formed reversibly is much higher than 15% since the measurement of WSOC<sub>p</sub> includes compounds formed through uptake of volatile water-soluble organic gases to aerosol water (aqSOA) and compounds formed through traditional SOA partitioning (e.g., (Donahue et al., 2009)). Further, the fraction of WSOC<sub>p</sub> that evaporates with drying is variable, with values of up to 60 % for individual measurements (El-Sayed et al., 2016). Together, these results indicate that representations of aqSOA formation through irreversible uptake schemes are not consistent with actual atmospheric phenomena. Models that include aqSOA and aerosol multiphase chemistry can improve predictions of OA (e.g., (Carlton et al., 2008; Marais et al., 2016)). A complication of model evaluations is that comparisons of modeled OA concentrations to ambient measurements may be problematic if the measurements, themselves, are subject to the bias discussed above. For this reason, accounting for both reversible and irreversible uptake of water-soluble organic gases to liquid water is critical (McNeill, 2015). Consistent with laboratory studies (Faust et al., 2017), our observations suggest that treatment of aqSOA as an irreversible uptake process is not consistent with actual phenomena occurring in the atmosphere, especially in the eastern U.S. Although likely due to a different mechanism, Liu et al. (2016) and Riva et



al. (2017) also showed that isoprene oxidation forms semi-volatile compounds that re-partition back to the gas phase after forming SOA.”

**18. Page 8, line 32-line 33. What are the traditional SOA pathways? I would recommend specifying it more clearly because “uptake to aqueous particles” sounds like a traditional pathway of SOA formation to me as well.**

We have clarified the text so that it now reads: “This suggests that the fraction of aqSOA that is formed reversibly is much higher than 15%, since the measurement of WSOC<sub>p</sub> includes compounds formed through uptake of volatile water-soluble organic gases to aerosol water (aqSOA) and compounds formed through traditional SOA partitioning (e.g., (Donahue et al., 2009)).”

**19. Page 8, line 36. Perhaps I am missing something here. Why is the reversible aqSOA even higher given that ~10 to 15% of the total WSOC<sub>p</sub> evaporates?**

We have clarified this sentence so that it now reads: “The results in Fig. 1 show that ≈10 to 15 % of the total WSOC<sub>p</sub> evaporates with drying during the late spring and summer, on average. This suggests that the fraction of aqSOA that is formed reversibly is much higher than 15% since the measurement of WSOC<sub>p</sub> includes compounds formed through uptake to aqueous particles (aqSOA) and compounds formed through traditional SOA pathways.”

**20. Page 9, line 15. The reason that ambient IEPOX-SOA has a low volatility can additionally be attributed to the higher viscosity of SOA. If the viscosity of the SOA is higher, then it will be more difficult for the semi-volatile species to evaporate and escape from the particle phase within the timescale of the measurement, as discussed in Vaden et al. (2011) and Zhang et al. (2015). This can be another reason why some ambient aerosols do not show strong reversibility and the author should consider putting it in the discussion.**

The reviewer brings up an interesting point. However, we do not believe that higher viscosity affects the apparent volatility of IEPOX-SOA in the studies we have referenced. During the summertime in the eastern U.S., relative humidity is high and aerosol liquid water is typically abundant, especially at night (e.g., (Guo et al., 2015)). This leads to conditions where the SOA has a liquid phase state (Shiraiwa et al., 2017), and is not phase-separated from ALW (Pye et al., 2017). Extensive results from the groups of Scot Martin and Allan Bertram show that under such conditions, viscosity of the SOA should not lead to diffusion limitations and longer equilibration timescales.

**21. Page 10, line 13-line 21. This paragraph is confusing as well. At the beginning of the paragraph the author seems to believe the effect of ALW on WSOC is not as significant as OA concentration. By the end of the paragraph the author concludes that WSOC is not due to OA partitioning. Please revise this paragraph to give a clearer explanation.**

We have clarified this paragraph so that it now reads: “The physical properties that affect SOA formed through absorptive partitioning (what Ervens et al. (2011) call gasSOA) and SOA formed through an aqueous mediated pathway (aqSOA) are fundamentally different (vapor pressure and gas solubility in water, respectively). Note that ALW can affect SOA formed through traditional absorptive partitioning by increasing the total concentration and decreasing the average molecular weight of the absorbing OM phase (Seinfeld and Pankow, 2003). Models predict that this phenomenon enhances SOA concentrations in the eastern U.S. (Jathar et al., 2016; Pankow et al., 2015), and that drying the particles will result in the evaporation of some semi-volatile SOA compounds in response to this perturbation (Pankow, 2010). However, we believe that the observed WSOC<sub>p</sub> evaporation during the late spring and summer seasons was the result of reversible aqSOA. The effect of ALW on gas-particle partitioning is more pronounced at low organic concentrations (1 to 2 μg m<sup>-3</sup>), and its sensitivity becomes less profound at higher OA concentrations (Pankow, 2010). Previous results from our group showed that the evaporated WSOC<sub>p</sub> concentrations increased significantly with an increase in OA concentrations (El-Sayed et al., 2016). Further, the semi-volatile organic compounds most influenced by this water effect are predicted to be the less oxidized, fresh SOA (Pankow, 2010). WSOC<sub>p</sub> is much more strongly correlated with the LV-OOA (low-volatility oxygenated organic aerosol) factor identified by the AMS compared to the SV-OOA (semi-volatile OOA) factor (Kondo et al., 2007; Sun et al., 2011; Xu et al., 2017). This suggests that the evaporation of WSOC<sub>p</sub> was not due to the overall effects on OA partitioning (Jathar et al., 2016), but was due to the reversible partitioning of water-soluble organic gases to aerosol water. In the following sections, we characterize the reasons underlying the seasonal differences in WSOC<sub>p,dry</sub>/WSOC<sub>p</sub> shown in Fig. 1.”

**22. Page 10, line 18. Please define LV-OOA and SV-OOA before using these two terms.**

These have been defined.



## Cited References

- Anderson, C.H., Dibb, J.E., Griffin, R.J., Hagler, G.S.W., Bergin, M.H., Atmospheric water-soluble organic carbon measurements at Summit, Greenland, *Atmospheric Environment* **42**(2008), pp. 5612-5621.
- Anderson, D.C. *et al.*, Measured and modeled CO and NO<sub>y</sub> in DISCOVER-AQ: An evaluation of emissions and chemistry over the eastern US, *Atmospheric environment* **96**(2014), pp. 78-87.
- Battaglia Jr, M.A., Douglas, S., Hennigan, C.J., Effect of the Urban Heat Island on Aerosol pH, *Environmental science & technology* **51**(2017), p. 13095.
- Beyersdorf, A.J. *et al.*, The impacts of aerosol loading, composition, and water uptake on aerosol extinction variability in the Baltimore–Washington, D.C. region, *Atmos. Chem. Phys.* **16**(2016), pp. 1003-1015.
- Budisulistiorini, S.H. *et al.*, Seasonal characterization of submicron aerosol chemical composition and organic aerosol sources in the southeastern United States: Atlanta, Georgia, and Look Rock, Tennessee, *Atmos. Chem. Phys.* **16**(2016), pp. 5171-5189.
- Carlton, A.G. *et al.*, CMAQ Model Performance Enhanced When In-Cloud Secondary Organic Aerosol is Included: Comparisons of Organic Carbon Predictions with Measurements, *Environmental Science & Technology* **42**(2008), pp. 8798-8802.
- Chan Miller, C. *et al.*, Glyoxal yield from isoprene oxidation and relation to formaldehyde: chemical mechanism, constraints from SENEX aircraft observations, and interpretation of OMI satellite data, *Atmos. Chem. Phys.* **17**(2017), pp. 8725-8738.
- De Haan, D.O. *et al.*, Secondary Organic Aerosol Formation by Self-Reactions of Methylglyoxal and Glyoxal in Evaporating Droplets, *Environmental Science & Technology* **43**(2009), pp. 8184-8190.
- Ding, X. *et al.*, Spatial and seasonal trends in biogenic secondary organic aerosol tracers and water-soluble organic carbon in the southeastern United States, *Environmental science & technology* **42**(2008), pp. 5171-5176.
- Donahue, N.M., Robinson, A.L., Pandis, S.N., Atmospheric organic particulate matter: From smoke to secondary organic aerosol, *Atmospheric Environment* **43**(2009), pp. 94-106.
- El-Sayed, M.M.H., Amenumey, D., Hennigan, C.J., Drying-Induced Evaporation of Secondary Organic Aerosol during Summer, *Environmental Science & Technology* **50**(2016), pp. 3626-3633.
- El-Sayed, M.M.H., Wang, Y.Q., Hennigan, C.J., Direct atmospheric evidence for the irreversible formation of aqueous secondary organic aerosol, *Geophysical Research Letters* **42**(2015), pp. 5577-5586.
- Ervens, B., Turpin, B.J., Weber, R.J., Secondary organic aerosol formation in cloud droplets and aqueous particles (aqSOA): a review of laboratory, field and model studies, *Atmos. Chem. Phys.* **11**(2011), pp. 11069-11102.
- Faust, J.A., Wong, J.P.S., Lee, A.K.Y., Abbatt, J.P.D., Role of Aerosol Liquid Water in Secondary Organic Aerosol Formation from Volatile Organic Compounds, *Environmental Science & Technology* **51**(2017), pp. 1405-1413.
- Guenther, A.B. *et al.*, The Model of Emissions of Gases and Aerosols from Nature version 2.1 (MEGAN2.1): an extended and updated framework for modeling biogenic emissions, *Geosci. Model Dev.* **5**(2012), pp. 1471-1492.
- Guo, H. *et al.*, Fine particle pH and gas–particle phase partitioning of inorganic species in Pasadena, California, during the 2010 CalNex campaign, *Atmospheric Chemistry and Physics* **17**(2017), pp. 5703-5719.
- Guo, H. *et al.*, Fine particle pH and the partitioning of nitric acid during winter in the northeastern United States, *Journal of Geophysical Research: Atmospheres* **121**(2016).
- Guo, H. *et al.*, Fine-particle water and pH in the southeastern United States, *Atmos. Chem. Phys.* **15**(2015), pp. 5211-5228.
- Hennigan, C.J., Bergin, M.H., Dibb, J.E., Weber, R.J., Enhanced secondary organic aerosol formation due to water uptake by fine particles, *Geophysical Research Letters* **35**(2008).
- Hennigan, C.J., Bergin, M.H., Russell, A.G., Nenes, A., Weber, R.J., Gas/particle partitioning of water-soluble organic aerosol in Atlanta, *Atmospheric Chemistry and Physics* **9**(2009), pp. 3613-3628.
- Jathar, S.H., Cappa, C.D., Wexler, A.S., Seinfeld, J.H., Kleeman, M.J., Simulating secondary organic aerosol in a regional air quality model using the statistical oxidation model – Part 1: Assessing the influence of constrained multi-generational ageing, *Atmos. Chem. Phys.* **16**(2016), pp. 2309-2322.
- Jimenez, J.L. *et al.*, Evolution of Organic Aerosols in the Atmosphere, *Science* **326**(2009), p. 1525.
- Khlystov, A., Stanier, C.O., Takahama, S., Pandis, S.N., Water content of ambient aerosol during the Pittsburgh air quality study, *Journal of Geophysical Research-Atmospheres* **110**(2005).

- Kleindienst, T.E. *et al.*, Estimates of the contributions of biogenic and anthropogenic hydrocarbons to secondary organic aerosol at a southeastern US location, *Atmospheric Environment* **41**(2007), pp. 8288-8300.
- Kondo, Y. *et al.*, Oxygenated and water-soluble organic aerosols in Tokyo, *Journal of Geophysical Research-Atmospheres* **112**(2007).
- Liu, Y., Kuwata, M., McKinney, K.A., Martin, S.T., Uptake and release of gaseous species accompanying the reactions of isoprene photo-oxidation products with sulfate particles, *Physical Chemistry Chemical Physics* **18**(2016), pp. 1595-1600.
- Marais, E.A. *et al.*, Aqueous-phase mechanism for secondary organic aerosol formation from isoprene: application to the southeast United States and co-benefit of SO<sub>2</sub> emission controls, *Atmos. Chem. Phys.* **16**(2016), pp. 1603-1618.
- McNeill, V.F., Aqueous Organic Chemistry in the Atmosphere: Sources and Chemical Processing of Organic Aerosols, *Environmental Science & Technology* **49**(2015), pp. 1237-1244.
- Nguyen, T.B. *et al.*, Organic aerosol formation from the reactive uptake of isoprene epoxydiols (IEPOX) onto non-acidified inorganic seeds, *Atmos. Chem. Phys.* **14**(2014), pp. 3497-3510.
- Pankow, J.F., Organic particulate material levels in the atmosphere: Conditions favoring sensitivity to varying relative humidity and temperature, *Proceedings of the National Academy of Sciences* **107**(2010), pp. 6682-6686.
- Pankow, J.F. *et al.*, Molecular view modeling of atmospheric organic particulate matter: Incorporating molecular structure and co-condensation of water, *Atmospheric Environment* **122**(2015), pp. 400-408.
- Pye, H.O.T. *et al.*, On the implications of aerosol liquid water and phase separation for organic aerosol mass, *Atmos. Chem. Phys.* **17**(2017), pp. 343-369.
- Pye, H.O.T. *et al.*, Epoxide Pathways Improve Model Predictions of Isoprene Markers and Reveal Key Role of Acidity in Aerosol Formation, *Environmental Science & Technology* **47**(2013), pp. 11056-11064.
- Riedel, T.P. *et al.*, Heterogeneous Reactions of Isoprene-Derived Epoxides: Reaction Probabilities and Molar Secondary Organic Aerosol Yield Estimates, *Environmental Science & Technology Letters* **2**(2015), pp. 38-42.
- Riva, M. *et al.*, Multiphase reactivity of gaseous hydroperoxide oligomers produced from isoprene ozonolysis in the presence of acidified aerosols, *Atmospheric Environment* **152**(2017), pp. 314-322.
- Seinfeld, J.H., Pankow, J.F., Organic atmospheric particulate material, *Annual review of physical chemistry* **54**(2003), pp. 121-140.
- Shiraiwa, M. *et al.*, Global distribution of particle phase state in atmospheric secondary organic aerosols, *Nature communications* **8**(2017).
- Sun, Y.L. *et al.*, Characterization of the sources and processes of organic and inorganic aerosols in New York city with a high-resolution time-of-flight aerosol mass spectrometer, *Atmos. Chem. Phys.* **11**(2011), pp. 1581-1602.
- Surratt, J.D. *et al.*, Reactive intermediates revealed in secondary organic aerosol formation from isoprene, *Proceedings of the National Academy of Sciences* **107**(2010), pp. 6640-6645.
- Timonen, H. *et al.*, Characteristics, sources and water-solubility of ambient submicron organic aerosol in springtime in Helsinki, Finland, *Journal of Aerosol Science* **56**(2013), pp. 61-77.
- Weber, R.J., Guo, H., Russell, A.G., Nenes, A., High aerosol acidity despite declining atmospheric sulfate concentrations over the past 15 years, *Nature Geoscience* **9**(2016), pp. 282-285.
- Weber, R.J. *et al.*, A study of secondary organic aerosol formation in the anthropogenic-influenced southeastern United States, *Journal of Geophysical Research-Atmospheres* **112**(2007).
- Xu, L. *et al.*, Effects of anthropogenic emissions on aerosol formation from isoprene and monoterpenes in the southeastern United States, *Proceedings of the National Academy of Sciences* **112**(2015), pp. 37-42.
- Xu, L., Guo, H., Weber, R.J., Ng, N.L., Chemical characterization of water-soluble organic aerosol in contrasting rural and urban environments in the southeastern United States, *Environmental science & technology* **51**(2016), pp. 78-88.
- Xu, W. *et al.*, Effects of Aqueous-Phase and Photochemical Processing on Secondary Organic Aerosol Formation and Evolution in Beijing, China, *Environmental Science & Technology* **51**(2017), pp. 762-770.
- Yu, K. *et al.*, Sensitivity to grid resolution in the ability of a chemical transport model to simulate observed oxidant chemistry under high-isoprene conditions, *Atmos. Chem. Phys.* **16**(2016), pp. 4369-4378.
- Zhang, X.L. *et al.*, On the gas-particle partitioning of soluble organic aerosol in two urban atmospheres with contrasting emissions: 1. Bulk water-soluble organic carbon, *Journal of Geophysical Research-Atmospheres* **117**(2012).



# The effects of isoprene and NO<sub>x</sub> on secondary organic aerosols formed through reversible and irreversible uptake to aerosol water

Marwa M. H. El-Sayed<sup>1</sup>, Diana L. Ortiz-Montalvo<sup>2</sup>, Christopher J. Hennigan<sup>1</sup>

5 <sup>1</sup> Department of Chemical, Biochemical and Environmental Engineering, University of Maryland, Baltimore County, Baltimore, MD, USA.

<sup>2</sup> National Institute of Standards and Technology (NIST), Gaithersburg, MD, USA.

*Correspondence to:* Christopher J. Hennigan (hennigan@umbc.edu)

**Abstract.** Isoprene oxidation produces water-soluble organic gases capable of partitioning to aerosol liquid water. The formation of secondary organic aerosols through such aqueous pathways (aqSOA) can take place either reversibly or irreversibly; however, the split between these fractions in the atmosphere is highly uncertain. The aim of this study was to characterize the reversibility of aqSOA formed from isoprene at a location in the eastern United States under substantial influence from both anthropogenic and biogenic emissions. The reversible and irreversible uptake of water-soluble organic gases to aerosol water was characterized in Baltimore, MD using measurements of particulate water-soluble organic carbon (WSOC<sub>p</sub>) in alternating dry and ambient configurations. WSOC<sub>p</sub> evaporation with drying was observed systematically throughout the late spring and summer, indicating reversible aqSOA formation during these times. We show through time lag analyses that WSOC<sub>p</sub> concentrations, including the WSOC<sub>p</sub> that evaporates with drying, peak 6 h to 11 h after isoprene concentrations, with maxima at a time lag of 9 h. The absolute reversible aqSOA concentrations, as well as the relative amount of reversible aqSOA, increased with decreasing NO<sub>x</sub>/isoprene ratios, suggesting that isoprene epoxydiol (IEPOX) or other low-NO<sub>x</sub> oxidation products ~~were~~ *may be* responsible for these effects. The observed relationships with NO<sub>x</sub> and isoprene suggest that this process occurs widely in the atmosphere, and is likely more important in other locations characterized by higher isoprene and/or lower NO<sub>x</sub> levels. *This work underscores the importance of accounting for both reversible and irreversible uptake of isoprene oxidation products to aqueous particles. It is also likely that this phenomenon will increase in importance in the future, given predictions of biogenic and anthropogenic emissions under future regulatory and climate scenarios.*

10  
15  
20  
25

## 1 Introduction

Isoprene (2-methyl-1,3-butadiene, C<sub>5</sub>H<sub>8</sub>) is the most abundant non-methane organic compound emitted globally (Guenther et al., 2012). *Isoprene oxidation stimulates tropospheric ozone production and contributes substantially to secondary organic aerosol (SOA) formation, thus impacting air quality and climate* (Henze and Seinfeld, 2006; Pfister et al., 2008). In the southeastern United States, isoprene is *likely* the dominant SOA precursor during summer (Ying et al., 2015; Kim et al., 2015). The oxidation products of isoprene include compounds that partition to aerosol liquid water (ALW), such as isoprene epoxydiol (IEPOX), glyoxal, and methylglyoxal. These species do

30

not partition to dry particles (Kroll et al., 2005; Nguyen et al., 2014), so their condensed phase products are called aqueous SOA (aqSOA) (Ervens et al., 2011). IEPOX uptake also depends on the inorganic composition and acidity of the seed particles (Surratt et al., 2010; Gaston et al., 2014; Budisulistiorini et al., 2017; Lin et al., 2012; Riedel et al., 2015). A body of work indicates that the uptake of water-soluble organic gases into atmospheric waters (clouds, fogs, and aerosol water) is an important pathway for SOA formation (Ervens et al., 2011). **Isoprene oxidation products can also form SOA in the absence of aerosol water** (Surratt et al., 2006; Nguyen et al., 2014), **though** the majority of **regional-scale** isoprene SOA is currently thought to form through aqueous pathways (Marais et al., 2016). Isoprene emissions show strong seasonal variations in most locations (Guenther et al., 2012), suggesting that aqSOA formation is similarly seasonal in nature. Indeed, SOA formed from IEPOX shows a pronounced seasonal signature in the southeastern U.S. that is consistent with isoprene emissions (Budisulistiorini et al., 2016; Xu et al., 2015).

Although substantial evidence from laboratory, modeling, and ambient studies indicates the importance of aqSOA formation, many uncertainties remain in understanding this pathway on a mechanistic level (McNeill, 2015). A significant uncertainty is the fate of aqSOA under conditions of water evaporation, such as in a cloud cycle or with diurnal changes in ambient relative humidity (RH). The formation of aqSOA is initiated by the equilibrium (and thus, reversible) partitioning of water-soluble organic gases to liquid water (McNeill, 2015). In the aqueous phase, the dissolved organics can undergo reversible reactions such as hydration and oligomerization (De Haan et al., 2009) or irreversible reactions such as acid catalysis, reaction with inorganics, or radical reactions (e.g. (Ervens et al., 2014; Ortiz-Montalvo et al., 2014; Lee et al., 2013)). The former process implies that at least some of the dissolved organics will repartition back to the gas phase when water evaporates, while the latter process can form low-volatility products that remain in the particle phase even after the evaporation of water. Most clouds are non-precipitating (Pruppacher, 1986) and ALW changes throughout the day with changing RH (Nguyen et al., 2014; Khlystov et al., 2005). **Thus**, determining whether the uptake is reversible or irreversible is critical in understanding the fate of many oxidized organics in the atmosphere. **While ambient studies provide evidence for both reversible and irreversible aqSOA formation** (El-Sayed et al., 2016; El-Sayed et al., 2015), **the reasons underlying these differences are still unclear. Models predict vastly different amounts of aqSOA depending on whether the uptake of water soluble organic gases is assumed to be completely irreversible or whether a reversible pathway is also considered (Marais et al., 2016; Pye et al., 2013).**

It is important to note that we define aqSOA as all organics present in the condensed phase through partitioning to liquid water, regardless of whether the uptake is reversible or irreversible. Although some definitions of aqSOA only include the organic material that is taken up into liquid water and remains in the particle phase after water evaporation (e.g. (Ervens et al., 2011)), we favor a more comprehensive definition since the organics contribute to aerosol effects on health and optical properties when they are in the condensed phase. Our definition is consistent with the treatment of other semi-volatile aerosol species such as ammonium nitrate. It is, however, important to distinguish reversible and irreversible aqSOA since the atmospheric lifetime of these compounds may differ significantly depending on their phase (Nguyen et al., 2015). Therefore, we define the low-volatility products that remain in the particle phase after the evaporation of liquid water as “irreversible aqSOA”, and the organic

compounds taken up in liquid water that re-partition back to the gas phase with water evaporation as “reversible aqSOA”. ~~While ambient studies provide evidence for both reversible and irreversible aqSOA formation (El-Sayed et al., 2016; El-Sayed et al., 2015), the reasons underlying these differences are still unclear.~~

5 Nitrogen oxides ( $\text{NO}_x \equiv \text{NO} + \text{NO}_2$ ) may be one factor affecting the reversibility of isoprene aqSOA.  $\text{NO}_x$  plays a critical role in the oxidation of volatile organic compounds (VOCs). This includes a major effect on the chemical pathway of isoprene oxidation, and on the resulting SOA yield (Kroll and Seinfeld, 2008; Ervens et al., 2008).  $\text{NO}_x$  affects the volatility, oxidation state, and aging of isoprene-derived SOA (Xu et al., 2014). Recent modeling studies predict that isoprene oxidation in the eastern U.S. is split almost equally between high- and low- $\text{NO}_x$  pathways (Travis et al., 2016). Laboratory studies show significant evaporation of aqueous isoprene SOA particles when  
10 dried, indicating reversible aqSOA (Wong et al., 2015). This is consistent with the understanding of aqSOA formed from individual isoprene oxidation products, thought to be predominantly IEPOX and glyoxal (Sareen et al., 2017). During the summer, model predictions suggest that glyoxal production from isoprene occurs almost equally through low- and high- $\text{NO}_x$  pathways in the eastern U.S. (Chan Miller et al., 2017). Glyoxal is taken up to ALW reversibly and irreversibly (Ortiz-Montalvo et al., 2012; Galloway et al., 2009). IEPOX is formed predominantly through the  
15 low- $\text{NO}_x$  pathway (Paulot et al., 2009; Surratt et al., 2010), and its uptake to ALW could be reversible or irreversible (Nguyen et al., 2014; Riedel et al., 2015). Therefore, potential differences in reversible aqSOA associated with  $\text{NO}_x$  may be due to differences in IEPOX production under these chemical regimes. The aim of this study was to characterize the effects of isoprene and  $\text{NO}_x$  on aqSOA formed reversibly and irreversibly at a site in the eastern U.S. heavily impacted by biogenic and anthropogenic emissions. The formation of aqSOA from IEPOX is a summertime occurrence in this region (Xu et al., 2015; Budisulistiorini et al., 2016), driven by the seasonality in isoprene emissions and ALW content (Xu et al., 2017b). However, the lack of specific SOA marker compounds has prevented a more comprehensive approach to measuring seasonal aqSOA from other precursors, such as glyoxal and methylglyoxal. Further, IEPOX taken up reversibly to ALW may not be measured (or may be measured incompletely) by some instruments capable of identifying IEPOX SOA (El-Sayed et al., 2016). Specifically, we  
20 determine the impacts of isoprene and  $\text{NO}_x$  on the reversible and irreversible uptake of water-soluble organic gases to aerosol liquid water in Baltimore, MD.  
25

## 2 Methods

### 2.1 WSOC measurements

Ambient measurements were carried out across all four seasons in Baltimore, MD (Table 1). The experimental  
30 setup has been described in detail elsewhere (El-Sayed et al., 2016; El-Sayed et al., 2015). Briefly, water-soluble organic carbon was measured in the gas phase ( $\text{WSOC}_g$ ) using a mist chamber (MC), and in the particle phase ( $\text{WSOC}_p$ ) using a Particle-into-liquid sampler (PILS, Brechtel Manufacturing), both coupled to a total organic carbon (TOC) analyzer (Model 900 Turbo, GE Analytical) operated in Turbo mode. The  $\text{WSOC}_p$  measurement was alternated between an ambient channel ( $\text{WSOC}_p$ ) and a ‘dried’ channel ( $\text{WSOC}_{p,\text{dry}}$ ) using an automated 3-way valve  
35 (Brechtel Manufacturing). The  $\text{WSOC}_p$  sample was at ambient RH while the  $\text{WSOC}_{p,\text{dry}}$  sample passed through a silica gel diffusion dryer (Table S1). Both the  $\text{WSOC}_p$  and the  $\text{WSOC}_{p,\text{dry}}$  samples pass through a parallel-plate



carbon denuder (Sunset Laboratories) prior to sampling in the PILS. This reduces gas-phase interferences, which are minor in the PILS (Sullivan et al., 2004), and prevents the re-condensation of volatilized organic gases that evaporate in the dryer. Although some gas-phase organics may be lost to the silica gel (Faust et al., 2017), potentially perturbing the gas-particle equilibrium for the dry channel, sampling both channels through the carbon denuder should minimize such differences. Further, based upon the timescales of ambient organic aerosol (OA) equilibration (minutes-to-hours) (Saha et al., 2017), it is highly unlikely that stripping gas-phase compounds would produce any appreciable OA evaporation with only the 7 s residence time encountered in our system. The diffusion dryer does not implement heating, so differences in the WSOC<sub>p</sub> concentrations between the two channels are due to WSOC<sub>p</sub> evaporation that results from ALW evaporation. Note that the WSOC<sub>p,dry</sub> channel has not been designed to dry particles completely to efflorescence (El-Sayed et al., 2016). WSOC<sub>p</sub> losses through the 3-way valve and through the dried channel are less than 1 % (mass concentration basis) (El-Sayed et al., 2016): no corrections to the data were applied. A ratio of OM/OC=2.1 was used to convert aerosol organic carbon (OC) into organic mass (OM), based upon characterizations of WSOC<sub>p</sub> in the eastern U.S. (Xu et al., 2017a).

WSOC<sub>p</sub> is operationally defined based upon the solubilities of the organics, themselves, and the level of dilution employed for the analysis (Psichoudaki and Pandis, 2013). In the eastern U.S., the WSOC<sub>p</sub> measurement is often used as a surrogate for SOA, especially during summer (Weber et al., 2007). The measurement includes SOA formed through absorptive partitioning and through aqueous-mediated pathways (aqSOA). We consider any WSOC<sub>p</sub> that evaporates with drying to be reversible aqSOA, since this material exists in the condensed phase because of the aerosol water and partitions back to the gas phase when the water evaporates.

The WSOC<sub>p,dry</sub> measurement system employs a total drying time of ≈7 s. The residence time for equilibrium to take place in evaporating water/organic droplets is dependent on the specific organics as well as the aerosol inorganic chemical composition. Longer drying times may increase the amount of evaporated aqSOA in our system, indicating that our measurements provide a conservative (low) bound estimate on the concentration of reversible aqSOA and on the WSOC<sub>p,dry</sub>/WSOC<sub>p</sub> ratio (El-Sayed et al., 2016).

The fully-automated online system was housed in a temperature-controlled environmental enclosure (EKTO, Inc.) placed on the rooftop of the Engineering Building at the University of Maryland, Baltimore County (UMBC). The three samples: WSOC<sub>g</sub>, WSOC<sub>p</sub> and WSOC<sub>p,dry</sub> were repeatedly measured in a 14-min cycle with sampling times of 4 min, 5 min and 5 min, respectively. Dynamic blanks were measured regularly throughout each ambient sampling period. Factory calibrations of the TOC Analyzer were regularly checked with sucrose solutions prepared to bracket the range of concentrations observed during ambient sampling.

## 2.2 VOC and NO<sub>x</sub> measurements

Isoprene measurements from the Essex Photochemical Assessment Monitoring Stations (PAMS) (AQS ID# 240053001) were provided by Maryland Department of the Environment (MDE). The Essex site represents the PAMS station closest to UMBC (≈20 km distance). Isoprene was measured by MDE every six days from September to May, and hourly during the summer (June, July and August). The hourly isoprene measurements were automated following EPA method 142, using cryogenic preconcentration for sample collection followed by analysis

via gas chromatography with flame ionization detection (GC-FID, Perkin Elmer Clarus 500). Hourly measurements of  $\text{NO}_x$  were also carried out by MDE at the Essex site following method 74 (chemiluminescence). Data were acquired from the U.S. Environmental Protection Agency (<https://aqz.epa.gov/api>).

5 A key assumption employed in this analysis is that the WSOC measurements made at UMBC are representative of conditions at Essex, the location of the  $\text{NO}_x$  and isoprene measurements. Aerosol concentrations in the Baltimore-Washington region are spatially uniform over tens of kilometers (Beyersdorf et al., 2016). Further,  $\text{WSOC}_p$  concentrations in the eastern U.S. exhibit small spatial variations across urban-to-rural gradients during the summertime (Weber et al., 2007). These prior analyses showed that aerosol concentrations, and in particular WSOC, were not dependent on wind direction. Isoprene emissions in the eastern U.S. are regional in nature, due to  
10 the expansive coverage of broadleaf forests (Pye et al., 2013; Guenther et al., 2012).  $\text{NO}_x$  emissions are spatially segregated from those of isoprene, and are far more localized. However, the isoprene- $\text{NO}_x$  chemical regime (high- or low- $\text{NO}_x$ ) in the eastern U.S. is generally well-represented with model resolution of 28 x 28 km, suggesting that the chemistry occurring on small scales, such as in individual power plant plumes, does not significantly affect the regional isoprene- $\text{NO}_x$  regime (Yu et al., 2016).  $\text{NO}_x$  concentrations at Essex (20 km ENE of UMBC) and HU-  
15 Beltsville (35 km SSW of UMBC) are strongly correlated ( $R = 0.89$ , Fig. S1), likely due to the overwhelming contribution of mobile source emissions along the heavily-traveled I-95 corridor to the region (Anderson et al., 2014). Together, this supports our analysis into the effects of isoprene and  $\text{NO}_x$  on reversible aqSOA using the measurements described above.

### 3 Results

20 An overview of the seasonal sampling periods is given in Table 1. Measurements were taken from 3 to 4 weeks on average during each of the four seasons. Note that the spring season has been divided into early (23 April to 8 May) and late (9 May to 14 May) periods due to the differences in the  $\text{WSOC}_p$  results observed during these times. The  $\text{WSOC}_p$  measurements have been reported to be a good surrogate of the total SOA in the atmosphere (Weber et al., 2007; Kondo et al., 2007), which includes aqSOA as well as SOA formed through traditional gas-phase partitioning  
25 (Donahue et al., 2009). The formation of aqSOA has been observed throughout the year, except for the early spring season. This observation was based on the relationship between the fraction of total WSOC in the particle phase,  $F_p$  ( $F_p = \text{WSOC}_p / (\text{WSOC}_p + \text{WSOC}_g)$ ) as a function of RH in combination with seasonal ALW analyses (Hennigan et al., 2008). The individual results for the fall and summer have been previously reported (El-Sayed et al., 2016; 2015). A synthesis of aqSOA formation across all seasons is the subject of ongoing analysis.

#### 30 3.1 Reversibility of aqSOA formation by season

Previous studies conducted by our group have provided evidence for both irreversible (El-Sayed et al., 2015) and reversible (El-Sayed et al., 2016) aqSOA formation during the fall and summer seasons, respectively. Figure 1 shows the  $\text{WSOC}_{p,\text{dry}}/\text{WSOC}_p$  ratio across all of the seasons. A ratio of unity indicates that drying did not impact  $\text{WSOC}_p$  while a ratio less than unity indicates that particle drying caused the evaporation of some  $\text{WSOC}_p$ , and thus  
35 was considered reversible aqSOA (El-Sayed et al., 2016). Figure 1 shows that the  $\text{WSOC}_{p,\text{dry}}/\text{WSOC}_p$  ratio was unity during the fall and winter, indicating that the  $\text{WSOC}_p$  remained in the condensed phase upon drying.

Therefore, the aqSOA formation that was observed occurred irreversibly (El-Sayed et al., 2015). In the early spring, the  $WSOC_{p,dry}/WSOC_p$  ratio was also unity, but this was expected since no  $F_p$ -RH enhancement was observed and no significant aqSOA was observed during this period. Beginning in the late spring and continuing into the summer, the  $WSOC_{p,dry}/WSOC_p$  ratio was systematically lower than unity. During both seasons, we observed systematic  
5 evaporation of some  $WSOC_p$  as a result of the ALW evaporation. In the late spring, the  $WSOC_{p,dry}/WSOC_p$  ratio was 0.92, on average, and decreased further during the summer where it reached an average of 0.87 (El-Sayed et al., 2016). This observation indicates that at least some of the aqSOA formation occurring in the late spring and summer seasons was reversible.  $WSOC_p$  evaporation was higher during the night than during the day (Fig. S2), likely due to higher RH levels and higher ALW at night (Guo et al., 2015).

10 We attribute the observed  $WSOC_p$  evaporation during the late spring and summer seasons to aqSOA that partitions reversibly to ALW. The physical properties that affect SOA formed through absorptive partitioning (what Ervens et al. (2011) call gasSOA) and SOA formed through an aqueous mediated pathway (aqSOA) are fundamentally different (vapor pressure and gas solubility in water, respectively). Note that ALW can affect SOA formed through traditional absorptive partitioning by increasing the total concentration and decreasing the average  
15 molecular weight of the absorbing OM phase (Seinfeld and Pankow, 2003). Models predict that this phenomenon enhances SOA concentrations in the eastern U.S. (Pankow et al., 2015; Jathar et al., 2016) and that drying the particles will result in the evaporation of some semi-volatile SOA compounds in response to this perturbation (Pankow, 2010). However, the effect of ALW on gas-particle partitioning is more pronounced at low organic concentrations ( $1$  to  $2 \mu\text{g m}^{-3}$ ), and its sensitivity becomes less profound at higher OA levels (Pankow, 2010).  
20 Previous results from our group showed the opposite effect: evaporated  $WSOC_p$  concentrations increased significantly with an increase in OA concentrations (El-Sayed et al., 2016). Further, the semi-volatile organic compounds most influenced by this water effect are predicted to be the less oxidized, fresh SOA (Pankow, 2010).  $WSOC_p$  is more strongly correlated with the LV-OOA (low-volatility oxygenated organic aerosol) factor identified by the Aerodyne aerosol mass spectrometer (AMS) compared to the SV-OOA (semi-volatile OOA) factor (Sun et al., 2011; Xu et al., 2017b; Kondo et al., 2007). This suggests that the evaporation of  $WSOC_p$  was not due to the  
25 overall effects on OA partitioning (Jathar et al., 2016), but was due to the reversible partitioning of water-soluble organic gases to aerosol water. In the following sections, we characterize the reasons underlying the seasonal differences in  $WSOC_{p,dry}/WSOC_p$  shown in Fig. 1.

### 3.2 Climatology of isoprene

30 Isoprene oxidation products are thought to be the most important precursors to aqSOA formation (Marais et al., 2016). Figure 2 shows the average annual climatology of isoprene in Baltimore, MD. These measurements were made at the MDE Essex site, a location  $\approx 20$  km from UMBC where the  $WSOC$  measurements were conducted. In the eastern U.S., isoprene emissions are regional (Palmer et al., 2003); therefore, data from the Essex site will show consistent trends with those at UMBC. Isoprene concentrations in Baltimore tend to be very low in the winter and  
35 early spring seasons, with average monthly values of  $\approx 0.2$  ppbC ( $\text{nmol mol}^{-1}$ ), but they start to rise sharply at the beginning of May, and remain elevated (though variable) during the summer season. This is highly consistent with previously measured seasonal isoprene emissions in other parts of the eastern U.S. (Goldstein et al., 1998). Isoprene

concentrations decrease dramatically in September (average decrease of 70 % from 1 Sept to 30 Sept), and then remain low through the winter.

### 3.3 Effect of isoprene on reversible aqSOA

During the late spring, the onset of reversible aqSOA formation corresponds to the dramatic increase in isoprene concentrations (Fig. 2). Observations of the AMS IEPOX factor (Budisulistiorini et al., 2016) and chemical markers for isoprene SOA (Kleindienst et al., 2007) show similarly sharp transitions in the spring and fall in the southeastern U.S. The highest reversible aqSOA levels were observed during the summer when isoprene emissions were at their maximum. Other VOCs, such as monoterpenes, also contribute to SOA in the eastern U.S. (Xu et al., 2015), but monoterpene and isoprene SOA tracers show distinctly different temporal patterns in the eastern U.S. Isoprene SOA peaks during the summer, but monoterpene SOA tracers exhibit similar (or lower) concentrations in the summer compared to other seasons (Kleindienst et al., 2007; Ding et al., 2008). Further, monoterpene SOA is typically associated with semi-volatile and less-oxidized OA factors in the AMS analysis (Xu et al., 2015; Jimenez et al., 2009) but WSOC<sub>p</sub> is poorly correlated with these factors (Timonen et al., 2013; Xu et al., 2016). On the basis of these prior studies and the results in Figures 1 and 2, we attribute the reversible aqSOA in Baltimore to isoprene.

Due to the magnitude of regional isoprene emissions and its predicted contribution to SOA, we would expect relationships between isoprene and both WSOC<sub>g</sub> and WSOC<sub>p</sub> concentrations. However, simple correlations between isoprene and WSOC are not expected, due to dramatic differences in their atmospheric lifetimes. Under typical summertime conditions, the oxidation of isoprene to form WSOC<sub>g</sub> will take a few hours (Hodzic et al., 2014). These oxidation products can undergo further reactions to form lower volatility compounds that partition to the aerosol phase contributing to WSOC<sub>p</sub>, a process that is expected to take several hours (Ng et al., 2006; Atkinson and Arey, 2003).

The relationship between isoprene and WSOC (both WSOC<sub>p</sub> and WSOC<sub>g</sub>) was characterized for the summer, when hourly isoprene data were available. To account for the differences in the expected timeframe for transformation of isoprene into WSOC<sub>g</sub> and WSOC<sub>p</sub>, we analyzed the WSOC concentrations as a function of isoprene with a variable time lag. We investigated the relationship between the isoprene concentrations at time  $t$  and the WSOC concentrations at  $t + n$ , where  $n$  is the time lag, which was systematically varied from (0 to 13) h. For example, a 1 h time lag indicates that the isoprene concentrations at  $t$  are compared to the WSOC concentrations measured  $t + 1$  h after those of isoprene. An offset of zero indicates that the timing of the WSOC measurements is aligned with the timing of the isoprene measurements. During each hour, there were 4 to 5 WSOC<sub>p</sub> and WSOC<sub>g</sub> measurements corresponding to one isoprene sample; therefore, hourly averages of WSOC were calculated to provide a consistent basis for analysis.

First, the isoprene-WSOC<sub>g</sub> relationship was analyzed for time lags in the range of (0 to 6) h (Fig. 3). The WSOC<sub>g</sub> data were binned based on the corresponding isoprene concentrations; each marker represents the median of the WSOC<sub>g</sub> concentration within each isoprene concentration bin. At (0 to 2) h time lags, no relationship was observed between isoprene and WSOC<sub>g</sub>. This was anticipated because isoprene has a typical atmospheric lifetime of (1 to 2) hours against oxidation by OH (Atkinson and Arey, 2003). However, with a time lag of 3 h, an increase in isoprene concentrations was coincident with an increase in WSOC<sub>g</sub> concentrations. This effect was observed for time lags up

to 5 h, as illustrated by the solid blue lines in Fig. 3. Across the entire summer, a 5 ppbC ( $\text{nmol mol}^{-1}$ ) increase in isoprene concentrations was associated with a median increase of  $2.0 \mu\text{g-C m}^{-3}$  in  $\text{WSOC}_g$ . When the time lag between isoprene and  $\text{WSOC}_g$  was more than 5 h, there was no longer a relationship between isoprene and  $\text{WSOC}_g$  concentrations. This observation highlights the effect of isoprene on the formation of water-soluble organic gases.

5 Isoprene and  $\text{WSOC}_g$  showed similar diurnal profiles during the summer, especially when the time lag was considered (Fig. S3). Overall, this suggests that fresh isoprene emissions take about (3 to 5) h to form  $\text{WSOC}_g$  in an urban environment during typical summertime conditions. Note that the measurement of  $\text{WSOC}_g$  only includes compounds with effective Henry's law constants above  $\approx 10^3 \text{ M atm}^{-1}$  ( $\approx 10^1 \text{ mol m}^{-3} \text{ Pa}^{-1}$ ) (Spaulding et al., 2002), so the MC does not efficiently sample many first-generation isoprene oxidation products, such as methacrolein ( $K_H = 4 \times 10^0 \text{ M atm}^{-1}$ , or  $4 \times 10^{-2} \text{ mol m}^{-3} \text{ Pa}^{-1}$ ) or methyl vinyl ketone ( $K_H = 4 \times 10^1 \text{ M atm}^{-1}$ , or  $4 \times 10^{-1} \text{ mol m}^{-3} \text{ Pa}^{-1}$ )  
10 (Sander, 2015).

The relationship between isoprene and evaporated  $\text{WSOC}_p$  (i.e., reversible aqSOA) was characterized using the same time-lag analysis, extended from  $n = (0 \text{ to } 13) \text{ h}$ . At time lags less than 5 h, there was no relationship between isoprene and evaporated  $\text{WSOC}_p$  concentrations (red dotted lines in Fig. 4). However, the amount of evaporated  
15  $\text{WSOC}_p$  increased with increasing isoprene concentrations when the evaporated  $\text{WSOC}_p$  time lag was in the range of (6 to 11) h (green solid lines in Fig. 4). The highest response of evaporated  $\text{WSOC}_p$  to isoprene was found for a time lag of 9 h. At this time lag, an increase of 5 ppbC ( $\text{nmol mol}^{-1}$ ) in isoprene concentrations led to a median increase of  $0.7 \mu\text{g m}^{-3}$  in evaporated  $\text{WSOC}_p$ . Beyond the 11 h time lag, no relationship was observed between isoprene and evaporated  $\text{WSOC}_p$  levels (blue dotted lines in Fig. 4). The average evaporated  $\text{WSOC}_p$  concentrations  
20 showed a similar increase with increasing isoprene, but were even higher than the median levels (Fig. S4). For example, at a 9 h time lag, a 5 ppbC ( $\text{nmol mol}^{-1}$ ) increase in isoprene corresponded to an average increase in evaporated  $\text{WSOC}_p$  of  $1.6 \mu\text{g m}^{-3}$ . **The (6 to 11) h time lag between isoprene and the evaporated  $\text{WSOC}_p$  is consistent with the predicted kinetics of IEPOX SOA formation in the eastern U.S.** (Budisulistiorini et al., 2017). This observed (6 to 11) h time lag between isoprene and the evaporated  $\text{WSOC}_p$  is likely due to multi-generational  
25 oxidation (Carlton et al., 2009; Hodzic et al., 2014; Paulot et al., 2009). Alternately, it could be that the isoprene oxidation products that partition reversibly to liquid water were formed relatively quickly ( $< 6 \text{ h}$ ), but responded to the diurnal cycle in ALW, which peaks in the eastern U.S. in the early morning hours (Guo et al., 2015). The observed delay time could also be the combination of these factors. Consistent with Fig. 3 and Fig. 4, there was also a strong relationship between the  $\text{WSOC}_g$  concentration and the time-offset evaporated  $\text{WSOC}_p$  concentration (Fig.  
30 S5). The above observations suggest that isoprene is strongly linked with the formation of reversible aqSOA in the eastern U.S. Based on this relationship, we next consider the effect of  $\text{NO}_x$  on reversible aqSOA formation since  $\text{NO}_x$  is critical to isoprene oxidation chemistry (Kroll et al., 2006).

Note that we assume that the  $\text{WSOC}_p$  measurement is a surrogate for SOA (Weber et al., 2007). However,  $\text{WSOC}_p$  is weakly correlated with lightly-oxygenated components in OA, such as the SV-OOA factor often resolved  
35 by the AMS (Timonen et al., 2013). Thus, our analysis would likely be a poor method for some SOA systems, for example  $\alpha$ -pinene ozonolysis (Jimenez et al., 2009). As discussed above, the  $\text{WSOC}_g$  measurement does not efficiently sample compounds with low Henry's law constants, including some first generation isoprene oxidation

products (Hodzic et al., 2014). These measurement limitations contribute to the (6 to 11) h and (3 to 5) h time lags for the isoprene associations with evaporated  $\text{WSOC}_p$  and  $\text{WSOC}_g$ , respectively. For many compounds, multi-generation oxidation contributes significantly to SOA formation (Ng et al., 2006), and this is almost certainly the case for atmospheric SOA (Jimenez et al., 2009). However, shorter lag times may be observed with other instruments sensitive to early-generation oxidation products.

### 3.4 Effect of $\text{NO}_x$ on reversible aqSOA

Figure 5 shows the relationship between evaporated  $\text{WSOC}_p$  and the  $\text{NO}_x$ /isoprene ratio during the summer. For this analysis, hourly  $\text{NO}_x$ /isoprene ratios and the hourly evaporated  $\text{WSOC}_p$  concentrations with a 9 h time lag were used, since this timing corresponded to the maximum evaporated  $\text{WSOC}_p$ . Blue markers represent the mean of the evaporated  $\text{WSOC}_p$  concentrations within each  $\text{NO}_x$ /isoprene bin. Figure 5 shows that the amount of evaporated  $\text{WSOC}_p$  decreased substantially with an increase in the  $\text{NO}_x$ /isoprene ratio. At low  $\text{NO}_x$ /isoprene ratios (less than 0.5 ppb/ppbC, or 0.5 mol mol<sup>-1</sup>), the amount of evaporated  $\text{WSOC}_p$  was at its maximum (average of 1.4  $\mu\text{g m}^{-3}$ ), however at  $\text{NO}_x$ /isoprene ratios more than 15 ppb/ppbC (mol mol<sup>-1</sup>), the evaporated  $\text{WSOC}_p$  was as low as 0.2  $\mu\text{g m}^{-3}$ . Generally, the evaporated  $\text{WSOC}_p$  decreased with the increase in  $\text{NO}_x$ /isoprene ratios, but flattened out beyond  $\text{NO}_x$ /isoprene ratios of  $\approx 5$  ppb/ppbC (mol mol<sup>-1</sup>).

Similarly, the effect of  $\text{NO}_x$ /isoprene ratios on  $\text{WSOC}_p$  concentrations during the summer is shown in Fig. 6. As in Fig. 5, the hourly  $\text{NO}_x$ /isoprene ratios were compared against the hourly  $\text{WSOC}_p$  concentrations at a time lag of 9 h. At  $\text{NO}_x$ /isoprene ratios of less than 0.5 ppb/ppbC (mol mol<sup>-1</sup>), the average  $\text{WSOC}_p$  concentration was  $\approx 5 \mu\text{g m}^{-3}$ , but it decreased substantially to  $\approx 1.5 \mu\text{g m}^{-3}$  (almost summertime  $\text{WSOC}_p$  background levels) at  $\text{NO}_x$ /isoprene ratios above 15 ppb/ppbC (mol mol<sup>-1</sup>).

If isoprene is indeed associated with the evaporated  $\text{WSOC}_p$  that we observed during the late spring and summer, then a logical question is why we did not observe this phenomenon during measurements throughout September (Fig. 1, El-Sayed et al., 2015). Although isoprene emissions decrease dramatically during September, there are still periods with elevated concentrations. Here, we analyze the effects of  $\text{NO}_x$  and isoprene on the reversibility of isoprene aqSOA by considering the average daily  $\text{NO}_x$ /isoprene ratios during the late spring, summer, and fall. For this analysis, daily averages were used due to the lack of hourly isoprene measurements during the late spring and fall. The relationship between the  $\text{WSOC}_{p,\text{dry}}/\text{WSOC}_p$  and  $\text{NO}_x$ /isoprene ratios across all three seasons is shown in Fig. 7. Figures 5 and 6 show that the relationships of the  $\text{NO}_x$ /isoprene ratio with  $\text{WSOC}_p$  and evaporated  $\text{WSOC}_p$  are qualitatively similar. However, it is clear from Fig. 7 that  $\text{WSOC}_p$  and the evaporated  $\text{WSOC}_p$  are affected differently by  $\text{NO}_x$ /isoprene. The days in which average  $\text{NO}_x$ /isoprene ratios were higher than 5 ppb/ppbC (mol mol<sup>-1</sup>) were characterized by  $\text{WSOC}_{p,\text{dry}}/\text{WSOC}_p$  ratios very close to unity, indicating irreversible aqSOA. On the other hand, the days in which  $\text{NO}_x$ /isoprene ratios were lower than 5 ppb/ppbC (mol mol<sup>-1</sup>) were all characterized by  $\text{WSOC}_{p,\text{dry}}/\text{WSOC}_p$  ratios lower than unity, indicating some reversible aqSOA on these days. Further, the  $\text{WSOC}_{p,\text{dry}}/\text{WSOC}_p$  ratio decreased with decreasing  $\text{NO}_x$ /isoprene ratios under this condition. IEPOX is produced under low- $\text{NO}_x$  conditions with very limited formation in  $\text{NO}_x$  rich environments (Zhang et al., 2017) whereas glyoxal can be produced from both low-and high- $\text{NO}_x$  pathways with higher yields at high- $\text{NO}_x$  conditions (Chan Miller et al., 2017). Based on our observations, this suggests that IEPOX was more abundant during the late spring



and summer and was responsible for the reversible aqSOA formed under the lower NO<sub>x</sub>/isoprene conditions. These results provide an explanation for the variability in the seasonal occurrence of reversible aqSOA in the eastern U.S.

There is uncertainty in the absolute NO<sub>x</sub>/isoprene ratio that represents the transition to reversible aqSOA.

5 Although NO<sub>x</sub> concentrations at Essex are strongly correlated with those at a site 50 km away (HU-Beltsville), the absolute NO<sub>x</sub> concentrations are approximately two times higher at Essex (Fig. S1), due to its closer proximity to downtown Baltimore. Therefore, although Figure 7 suggests that reversible aqSOA formation occurs at NO<sub>x</sub>/isoprene ratios below 5 ppb/ppbC (mol mol<sup>-1</sup>), transitions at lower ratios may be observed in other areas.

#### 4 Atmospheric Implications

10 These results represent the first observations to characterize the seasonal occurrence of reversible aqSOA formation. The results suggest an important effect on aerosol measurements that implement drying, which may not measure (or may incompletely measure) reversible aqSOA. Our results suggest that this is especially relevant in areas with high isoprene emissions. For example, Zhang et al. (2012) observed substantial loss of WSOC<sub>p</sub> (≈30 % on average) from Federal Reference Method (FRM) filters in the southeastern U.S. It is likely that reversible aqSOA contributed to this measurement artifact, although direct comparisons to our WSOC<sub>p,dry</sub> measurement would  
15 be needed to test this hypothesis. These compounds are important, since they contribute to aerosol effects – visibility, aerosol optical depth (AOD), health, climate – when they are in the condensed phase.

We hypothesize that the evaporation of WSOC<sub>p</sub> observed with drying during the late spring and summer is due to the reversible partitioning of IEPOX to aerosol water, or to other low-NO<sub>x</sub> isoprene oxidation products such as multifunctional hydroperoxides (Liu et al., 2016a; Krechmer et al., 2015; Riva et al., 2016). This is supported by  
20 strong associations between the evaporated WSOC<sub>p</sub> and isoprene concentrations using the time lag analysis. It is further supported by the decreasing WSOC<sub>p,dry</sub>/WSOC<sub>p</sub> ratios with decreasing NO<sub>x</sub>/isoprene ratios. Note that Sareen et al. (2017) predict very low dissolved IEPOX in the eastern U.S. during summer (< 0.01 μg m<sup>-3</sup>), suggesting reversibly formed reaction products are the dominant contributors to reversible aqSOA.

Laboratory studies have found reversible and irreversible uptake of IEPOX to aqueous particles (Nguyen et al.,  
25 2014; Riedel et al., 2015). However, ambient studies generally suggest that IEPOX-SOA has very low volatility (Lopez-Hilfiker et al., 2016; Hu et al., 2016). This could be due to challenges measuring the reversible aqSOA by the methods used to derive volatilities. For example, it is unclear how the instruments employed by Lopez-Hilfiker et al. (2016) and Hu et al. (2016) respond to reversible IEPOX reaction products present in the aqueous phase. It could also be that the evaporated WSOC<sub>p</sub> we observe is contributed by other low-NO<sub>x</sub> isoprene oxidation products.  
30 Approximately 30 % of isoprene-SOA generated under NO<sub>x</sub>-free conditions partitioned reversibly to aerosol water, but the molecular identities of the reversible aqSOA were not determined (Wong et al., 2015). Although the experiments of Wong et al. (2015) were performed in a chemical regime where IEPOX formation is favored, it did not contribute to the SOA in their experiments due to high OH levels. Given the absence of IEPOX-SOA in the experiments of Wong et al. (2015), the atmospheric relevance of their results needs further review. The uptake of  
35 other, non-IEPOX, low-NO<sub>x</sub> oxidation products may explain such observations (Liu et al., 2016b; Riva et al., 2016;

Krechmer et al., 2015; Liu et al., 2016a). Overall, identifying the molecular composition of the reversible aqSOA that is associated with low-NO<sub>x</sub> isoprene oxidation will require targeted field measurements.

The effect of water evaporation on WSOC<sub>p</sub> also has important implications for the representation of SOA formation in models. The results in Fig. 1 show that ≈10 to 15 % of the total WSOC<sub>p</sub> evaporates with drying during the late spring and summer, on average. This suggests that the fraction of aqSOA that is formed reversibly is much higher than 15%, since the measurement of WSOC<sub>p</sub> includes aqSOA and compounds formed through traditional SOA partitioning (e.g., (Donahue et al., 2009)). Further, the fraction of WSOC<sub>p</sub> that evaporates with drying is variable, with values of up to 60 % for individual measurements (El-Sayed et al., 2016). Models that include aqSOA and aerosol multiphase chemistry can improve predictions of OA (e.g., (Carlton et al., 2008; Marais et al., 2016)). A complication of model evaluations is that comparisons of modeled OA concentrations to ambient measurements may be problematic if the measurements, themselves, are subject to the bias discussed above. For this reason, accounting for both reversible and irreversible uptake of water-soluble organic gases to liquid water is critical (McNeill, 2015). Our observations, supported by laboratory studies (Faust et al., 2017), suggest that treatment of aqSOA as an irreversible uptake process is not consistent with actual phenomena occurring in the atmosphere, especially in the eastern U.S. Although likely due to a different mechanism, Liu et al. (2016b) and Riva et al. (2017) also showed that isoprene oxidation forms semi-volatile compounds that re-partition back to the gas phase after forming SOA.

The lifetime of organic compounds in the atmosphere is strongly dependent on their phase (Pye et al., 2017). Oxygenated organic compounds in the gas-phase often have much shorter lifetimes than particle-phase organics due to significantly higher dry deposition velocities (Nguyen et al., 2015) and photolysis rates (Fu et al., 2008). The reversible uptake of WSOC<sub>g</sub> to aerosol water may effectively shield these species from such loss processes, resulting in enhanced transport. Thus, accounting for the reversible partitioning of water-soluble organic gases to aerosol water would likely improve model predictions of these compounds.

NO<sub>x</sub> plays a critical role in the oxidation of VOCs, including effects on the composition and quantity of SOA produced. Herein, we show that NO<sub>x</sub> strongly affects the amount and nature of SOA produced in an urban area that is under substantial influence from biogenic emissions. Higher concentrations of WSOC<sub>p</sub> were associated with decreasing NO<sub>x</sub>/isoprene ratios. The fraction of WSOC<sub>p</sub> that evaporated with drying was also inversely related to NO<sub>x</sub>/isoprene. In the future, isoprene concentrations are predicted to increase in response to changes in temperature and land use associated with climate change (Heald et al., 2008; Sanderson et al., 2003). The eastern U.S. is currently undergoing a transition from high- to low-NO<sub>x</sub> chemical regimes (Travis et al., 2016; Edwards et al., 2017), and NO<sub>x</sub> levels are likely to continue decreasing (He et al., 2013). This suggests future NO<sub>x</sub>/isoprene ratios will generally decrease across the eastern U.S., as well, resulting in increased production of reversible aqSOA. The current results are from the greater Baltimore metropolitan area; although we observe a range of NO<sub>x</sub> concentrations and NO<sub>x</sub>/isoprene ratios, these measurements are representative of an urban environment. Thus, we may expect WSOC<sub>p,dry</sub>/WSOC<sub>p</sub> ratios to be even lower in more rural environments impacted by isoprene emissions.

In addition to NO<sub>x</sub>, sulfate also strongly affects SOA formation from isoprene through its separate contributions to ALW, particle acidity, and aqueous chemistry (Xu et al., 2015; Nguyen et al., 2014; Surratt et al., 2010). Laboratory

studies have not yet elucidated the role of each factor in the reversibility of isoprene SOA, and we do not have sufficient sulfate data to characterize such effects with our analysis. However, it is worth noting that particle acidity is not likely a factor in the relative split between reversible and irreversible aqSOA formed from isoprene. Studies predict that particles in the eastern U.S. are highly acidic throughout the year (Weber et al., 2016; Battaglia et al., 2017; Guo et al., 2016; 2015), and acidity is not a limiting factor in isoprene SOA formation during the summer (Budisulistiorini et al., 2016; Xu et al., 2015). The implication from our observations is that reversible aqSOA from isoprene forms even in the presence of such persistently acidic particles. This further questions the treatment of isoprene SOA as an irreversible uptake process in models.

## 10 5 Conclusions

The eastern U.S. is undergoing a transition from a high- to low- $\text{NO}_x$  chemical regime, which has broad implications for nighttime chemistry, ozone production, and SOA formation (Travis et al., 2016; Marais et al., 2016; Edwards et al., 2017). Using a time lag analysis, we show that  $\text{NO}_x$ /isoprene strongly affects concentrations of SOA in the eastern U.S., including SOA formed through the reversible uptake of water-soluble organic gases to aqueous particles. Lower  $\text{NO}_x$  leads to a higher fraction of aqueous SOA formed reversibly. Our measurements from an urban area suggest that this process is even more important in other, more rural environments.

Predictions of future  $\text{NO}_x$  and isoprene emissions in response to regulations, technology, and climate change also suggest that this process may increase in importance going forward. Such an inference is complicated by concurrent reductions in  $\text{SO}_2$  emissions in the U.S. and other developed nations. The consequent decreases in sulfate may offset the effects of  $\text{NO}_x$  reductions on isoprene SOA (de Sá et al., 2017). However, we stress that prior studies into the  $\text{NO}_x$ -sulfate-isoprene system have not systematically determined how these species affect the reversibility of isoprene SOA. Therefore, while we hypothesize that future decreases in  $\text{NO}_x$  and increases in isoprene will increase reversible isoprene SOA (or at least the reversible fraction), the role of changing sulfate will also need to be considered. Future laboratory and modeling studies will be needed to address this question directly.

We hypothesize that IEPOX uptake to aqueous particles is responsible for the reversible aqSOA, but other low- $\text{NO}_x$  isoprene oxidation products are possible, as well (Wong et al., 2015). We quantify reversible aqSOA through observations of  $\text{WSOC}_p$  evaporation that results from drying. Ultimately, molecular composition measurements made concurrently with our  $\text{WSOC}$  system are required to identify the chemical species responsible for this phenomenon. The evaporation of  $\text{WSOC}_p$  with drying occurred systematically during the late spring and summer, and was linked to isoprene and  $\text{NO}_x$ . This has importance for a wide range of aerosol measurements that implement drying. It also has importance for modeling multi-phase SOA formation, as simplified treatment of irreversible uptake does not represent actual atmospheric processes.

## Acknowledgments

Certain commercial equipment, instruments or materials are identified in this paper to foster understanding. Such identification does not imply recommendation or endorsement by the National Institute of Standards and Technology.

The data used in this analysis are available upon request. This work was supported by the National Science Foundation through Award CHE-1454763.

## References

- Anderson, D. C., Loughner, C. P., Diskin, G., Weinheimer, A., Canty, T. P., Salawitch, R. J., Worden, H. M., Fried, A., Mikoviny, T., and Wisthaler, A.: Measured and modeled CO and NO<sub>y</sub> in DISCOVER-AQ: An evaluation of emissions and chemistry over the eastern US, *Atmos. Environ.*, 96, 78-87, **2014**.
- 10 Atkinson, R., and Arey, J.: Atmospheric Degradation of Volatile Organic Compounds, *Chemical Reviews*, 103, 4605-4638, doi:10.1021/cr0206420, **2003**.
- Battaglia Jr, M. A., Douglas, S., and Hennigan, C. J.: Effect of the Urban Heat Island on Aerosol pH, *Environ. Sci. Technol.*, 51, 13095, **2017**.
- Beyersdorf, A. J., Ziemba, L. D., Chen, G., Corr, C. A., Crawford, J. H., Diskin, G. S., Moore, R. H., Thornhill, K. L., Winstead, E. L., and Anderson, B. E.: The impacts of aerosol loading, composition, and water uptake on aerosol extinction variability in the Baltimore–Washington, D.C. region, *Atmos. Chem. Phys.*, 16, 1003-1015, doi:10.5194/acp-16-1003-2016, **2016**.
- 15 Budisulistiorini, S. H., Baumann, K., Edgerton, E. S., Bairai, S. T., Mueller, S., Shaw, S. L., Knipping, E. M., Gold, A., and Surratt, J. D.: Seasonal characterization of submicron aerosol chemical composition and organic aerosol sources in the southeastern United States: Atlanta, Georgia, and Look Rock, Tennessee, *Atmos. Chem. Phys.*, 16, 5171-5189, doi:10.5194/acp-16-5171-2016, **2016**.
- 20 Budisulistiorini, S. H., Nenes, A., Carlton, A. G., Surratt, J. D., McNeill, V. F., and Pye, H. O. T.: Simulating Aqueous-Phase Isoprene-Epoxydiol (IEPOX) Secondary Organic Aerosol Production During the 2013 Southern Oxidant and Aerosol Study (SOAS), *Environ. Sci. Technol.*, 51, 5026-5034, doi:10.1021/acs.est.6b05750, **2017**.
- 25 Carlton, A. G., Turpin, B. J., Altieri, K. E., Seitzinger, S. P., Mathur, R., Roselle, S. J., and Weber, R. J.: CMAQ Model Performance Enhanced When In-Cloud Secondary Organic Aerosol is Included: Comparisons of Organic Carbon Predictions with Measurements, *Environ. Sci. Technol.*, 42, 8798-8802, doi:10.1021/es801192n, **2008**.
- Carlton, A. G., Wiedinmyer, C., and Kroll, J. H.: A review of Secondary Organic Aerosol (SOA) formation from isoprene, *Atmos. Chem. Phys.*, 9, 4987-5005, doi:10.5194/acp-9-4987-2009, **2009**.
- 30 Chan Miller, C., Jacob, D. J., Marais, E. A., Yu, K., Travis, K. R., Kim, P. S., Fisher, J. A., Zhu, L., Wolfe, G. M., Hanisco, T. F., Keutsch, F. N., Kaiser, J., Min, K. E., Brown, S. S., Washenfelder, R. A., González Abad, G., and Chance, K.: Glyoxal yield from isoprene oxidation and relation to formaldehyde: chemical mechanism, constraints from SENEX aircraft observations, and interpretation of OMI satellite data, *Atmos. Chem. Phys.*, 17, 8725-8738, doi:10.5194/acp-17-8725-2017, **2017**.

- De Haan, D. O., Corrigan, A. L., Tolbert, M. A., Jimenez, J. L., Wood, S. E., and Turley, J. J.: Secondary Organic Aerosol Formation by Self-Reactions of Methylglyoxal and Glyoxal in Evaporating Droplets, *Environ. Sci. Technol.*, 43, 8184-8190, doi:10.1021/es902152t, **2009**.
- 5 de Sá, S. S., Palm, B. B., Campuzano-Jost, P., Day, D. A., Newburn, M. K., Hu, W., Isaacman-VanWertz, G., Yee, L. D., Thalman, R., and Brito, J.: Influence of urban pollution on the production of organic particulate matter from isoprene epoxydiols in central Amazonia, *Atmos. Chem. Phys.*, 17, 6611-6629, **2017**.
- Ding, X., Zheng, M., Yu, L., Zhang, X., Weber, R. J., Yan, B., Russell, A. G., Edgerton, E. S., and Wang, X.: Spatial and seasonal trends in biogenic secondary organic aerosol tracers and water-soluble organic carbon in the southeastern United States, *Environ. Sci. Technol.*, 42, 5171-5176, **2008**.
- 10 Donahue, N. M., Robinson, A. L., and Pandis, S. N.: Atmospheric organic particulate matter: From smoke to secondary organic aerosol, *Atmos. Environ.*, 43, 94-106, **2009**.
- Edwards, P. M., Aikin, K. C., Dube, W. P., Fry, J. L., Gilman, J. B., de Gouw, J. A., Graus, M. G., Hanisco, T. F., Holloway, J., Hubler, G., Kaiser, J., Keutsch, F. N., Lerner, B. M., Neuman, J. A., Parrish, D. D., Peischl, J., Pollack, I. B., Ravishankara, A. R., Roberts, J. M., Ryerson, T. B., Trainer, M., Veres, P. R., Wolfe, G. M.,
- 15 Warneke, C., and Brown, S. S.: Transition from high- to low-NO<sub>x</sub> control of night-time oxidation in the southeastern US, *Nature Geosci*, 10, 490-495, doi:10.1038/ngeo2976, **2017**.
- El-Sayed, M. M. H., Wang, Y. Q., and Hennigan, C. J.: Direct atmospheric evidence for the irreversible formation of aqueous secondary organic aerosol, *Geophys. Res. Lett.*, 42, 5577-5586, doi:10.1002/2015gl064556, **2015**.
- 20 El-Sayed, M. M. H., Amenumey, D., and Hennigan, C. J.: Drying-Induced Evaporation of Secondary Organic Aerosol during Summer, *Environ. Sci. Technol.*, 50, 3626-3633, doi:10.1021/acs.est.5b06002, **2016**.
- Ervens, B., Carlton, A. G., Turpin, B. J., Altieri, K. E., Kreidenweis, S. M., and Feingold, G.: Secondary organic aerosol yields from cloud-processing of isoprene oxidation products, *Geophys. Res. Lett.*, 35, doi:10.1029/2007gl031828, **2008**.
- 25 Ervens, B., Turpin, B. J., and Weber, R. J.: Secondary organic aerosol formation in cloud droplets and aqueous particles (aqSOA): a review of laboratory, field and model studies, *Atmos. Chem. Phys.*, 11, 11069-11102, doi:10.5194/acp-11-11069-2011, **2011**.
- Ervens, B., Sorooshian, A., Lim, Y. B., and Turpin, B. J.: Key parameters controlling OH-initiated formation of secondary organic aerosol in the aqueous phase (aqSOA), *J. Geophys. Res.- Atmospheres*, 119, 3997-4016, doi:10.1002/2013JD021021, **2014**.
- 30 Faust, J. A., Wong, J. P. S., Lee, A. K. Y., and Abbatt, J. P. D.: Role of Aerosol Liquid Water in Secondary Organic Aerosol Formation from Volatile Organic Compounds, *Environ. Sci. Technol.*, 51, 1405-1413, doi:10.1021/acs.est.6b04700, **2017**.
- Fu, T. M., Jacob, D. J., Wittrock, F., Burrows, J. P., Vrekoussis, M., and Henze, D. K.: Global budgets of atmospheric glyoxal and methylglyoxal, and implications for formation of secondary organic aerosols, *J. Geophys. Res.-Atmospheres*, 113, doi:10.1029/2007jd009505, **2008**.
- 35

- Galloway, M. M., Chhabra, P. S., Chan, A. W. H., Surratt, J. D., Flagan, R. C., Seinfeld, J. H., and Keutsch, F. N.: Glyoxal uptake on ammonium sulphate seed aerosol: reaction products and reversibility of uptake under dark and irradiated conditions, *Atmos. Chem. Phys.*, 9, 3331-3345, doi:10.5194/acp-9-3331-2009, **2009**.
- 5 Gaston, C. J., Riedel, T. P., Zhang, Z., Gold, A., Surratt, J. D., and Thornton, J. A.: Reactive Uptake of an Isoprene-Derived Epoxydiol to Submicron Aerosol Particles, *Environ. Sci. Technol.*, 48, 11178-11186, doi:10.1021/es5034266, **2014**.
- Goldstein, A. H., Goulden, M. L., Munger, J. W., Wofsy, S. C., and Geron, C. D.: Seasonal course of isoprene emissions from a midlatitude deciduous forest, *J. Geophys. Res.-Atmospheres*, 103, 31045-31056, doi:10.1029/98jd02708, **1998**.
- 10 Guenther, A. B., Jiang, X., Heald, C. L., Sakulyanontvittaya, T., Duhl, T., Emmons, L. K., and Wang, X.: The Model of Emissions of Gases and Aerosols from Nature version 2.1 (MEGAN2.1): an extended and updated framework for modeling biogenic emissions, *Geosci. Model Dev.*, 5, 1471-1492, doi:10.5194/gmd-5-1471-2012, **2012**.
- 15 Guo, H., Xu, L., Bougiatioti, A., Cerully, K. M., Capps, S. L., Hite Jr, J. R., Carlton, A. G., Lee, S. H., Bergin, M. H., Ng, N. L., Nenes, A., and Weber, R. J.: Fine-particle water and pH in the southeastern United States, *Atmos. Chem. Phys.*, 15, 5211-5228, doi:10.5194/acp-15-5211-2015, **2015**.
- Guo, H., Sullivan, A. P., Campuzano-Jost, P., Schroder, J. C., Lopez-Hilfiker, F. D., Dibb, J. E., Jimenez, J. L., Thornton, J. A., Brown, S. S., and Nenes, A.: Fine particle pH and the partitioning of nitric acid during winter in the northeastern United States, *J. Geophys. Res.- Atmospheres*, 121, **2016**.
- 20 He, H., Stehr, J. W., Hains, J. C., Krask, D. J., Doddridge, B. G., Vinnikov, K. Y., Canty, T. P., Hosley, K. M., Salawitch, R. J., Worden, H. M., and Dickerson, R. R.: Trends in emissions and concentrations of air pollutants in the lower troposphere in the Baltimore/Washington airshed from 1997 to 2011, *Atmos. Chem. Phys.*, 13, 7859-7874, doi:10.5194/acp-13-7859-2013, **2013**.
- 25 Heald, C. L., Henze, D. K., Horowitz, L. W., Feddes, J., Lamarque, J. F., Guenther, A., Hess, P. G., Vitt, F., Seinfeld, J. H., Goldstein, A. H., and Fung, I.: Predicted change in global secondary organic aerosol concentrations in response to future climate, emissions, and land use change, *J. Geophys. Res.-Atmospheres*, 113, doi:10.1029/2007jd009092, **2008**.
- Hennigan, C. J., Bergin, M. H., Dibb, J. E., and Weber, R. J.: Enhanced secondary organic aerosol formation due to water uptake by fine particles, *Geophysical Research Letters*, 35, doi:10.1029/2008gl035046, **2008**.
- 30 Henze, D. K., and Seinfeld, J. H.: Global secondary organic aerosol from isoprene oxidation, *Geophys. Res. Lett.*, 33, doi:10.1029/2006gl025976, **2006**.
- Hodzic, A., Aumont, B., Knote, C., Lee-Taylor, J., Madronich, S., and Tyndall, G.: Volatility dependence of Henry's law constants of condensable organics: Application to estimate depositional loss of secondary organic aerosols, *Geophys. Res. Lett.*, 41, 4795-4804, doi:10.1002/2014gl060649, **2014**.
- 35 Hu, W., Palm, B. B., Day, D. A., Campuzano-Jost, P., Krechmer, J. E., Peng, Z., de Sá, S. S., Martin, S. T., Alexander, M. L., Baumann, K., Hacker, L., Kiendler-Scharr, A., Koss, A. R., de Gouw, J. A., Goldstein, A. H., Seco, R., Sjostedt, S. J., Park, J. H., Guenther, A. B., Kim, S., Canonaco, F., Prévôt, A. S. H., Brune, W. H., and



- Jimenez, J. L.: Volatility and lifetime against OH heterogeneous reaction of ambient isoprene-epoxydiols-derived secondary organic aerosol (IEPOX-SOA), *Atmos. Chem. Phys.*, 16, 11563-11580, doi:10.5194/acp-16-11563-2016, **2016**.
- 5 Jathar, S. H., Cappa, C. D., Wexler, A. S., Seinfeld, J. H., and Kleeman, M. J.: Simulating secondary organic aerosol in a regional air quality model using the statistical oxidation model – Part 1: Assessing the influence of constrained multi-generational ageing, *Atmos. Chem. Phys.*, 16, 2309-2322, doi:10.5194/acp-16-2309-2016, **2016**.
- 10 Jimenez, J. L., Canagaratna, M. R., Donahue, N. M., Prevot, A. S. H., Zhang, Q., Kroll, J. H., DeCarlo, P. F., Allan, J. D., Coe, H., Ng, N. L., Aiken, A. C., Docherty, K. S., Ulbrich, I. M., Grieshop, A. P., Robinson, A. L., Duplissy, J., Smith, J. D., Wilson, K. R., Lanz, V. A., Hueglin, C., Sun, Y. L., Tian, J., Laaksonen, A., Raatikainen, T., Rautiainen, J., Vaattovaara, P., Ehn, M., Kulmala, M., Tomlinson, J. M., Collins, D. R., Cubison, M. J., Dunlea, J., Huffman, J. A., Onasch, T. B., Alfarra, M. R., Williams, P. I., Bower, K., Kondo, Y., Schneider, J., Drewnick, F., Borrmann, S., Weimer, S., Demerjian, K., Salcedo, D., Cottrell, L., Griffin, R., Takami, A., Miyoshi, T., Hatakeyama, S., Shimono, A., Sun, J. Y., Zhang, Y. M., Dzepina, K., Kimmel, J. R., Sueper, D., Jayne, J. T., Herndon, S. C., Trimborn, A. M., Williams, L. R., Wood, E. C., Middlebrook, A. M., Kolb, C. E., Baltensperger, U., and Worsnop, D. R.: Evolution of Organic Aerosols in the Atmosphere, *Science*, 326, 1525, **2009**.
- 15 Khlystov, A., Stanier, C. O., Takahama, S., and Pandis, S. N.: Water content of ambient aerosol during the Pittsburgh air quality study, *J. Geophys. Res.-Atmospheres*, 110, doi:10.1029/2004jd004651, **2005**.
- 20 Kim, P. S., Jacob, D. J., Fisher, J. A., Travis, K., Yu, K., Zhu, L., Yantosca, R. M., Sulprizio, M. P., Jimenez, J. L., Campuzano-Jost, P., Froyd, K. D., Liao, J., Hair, J. W., Fenn, M. A., Butler, C. F., Wagner, N. L., Gordon, T. D., Welti, A., Wennberg, P. O., Crounse, J. D., St. Clair, J. M., Teng, A. P., Millet, D. B., Schwarz, J. P., Markovic, M. Z., and Perring, A. E.: Sources, seasonality, and trends of southeast US aerosol: an integrated analysis of surface, aircraft, and satellite observations with the GEOS-Chem chemical transport model, *Atmos. Chem. Phys.*, 15, 10411-10433, doi:10.5194/acp-15-10411-2015, **2015**.
- 25 Kleindienst, T. E., Jaoui, M., Lewandowski, M., Offenberg, J. H., Lewis, C. W., Bhave, P. V., and Edney, E. O.: Estimates of the contributions of biogenic and anthropogenic hydrocarbons to secondary organic aerosol at a southeastern US location, *Atmospheric Environment*, 41, 8288-8300, doi:10.1016/j.atmosenv.2007.06.045, **2007**.
- 30 Kondo, Y., Miyazaki, Y., Takegawa, N., Miyakawa, T., Weber, R. J., Jimenez, J. L., Zhang, Q., and Worsnop, D. R.: Oxygenated and water-soluble organic aerosols in Tokyo, *J. Geophys. Res.-Atmospheres*, 112, doi:10.1029/2006jd007056, **2007**.
- Krechmer, J. E., Coggon, M. M., Massoli, P., Nguyen, T. B., Crounse, J. D., Hu, W., Day, D. A., Tyndall, G. S., Henze, D. K., and Rivera-Rios, J. C.: Formation of low volatility organic compounds and secondary organic aerosol from isoprene hydroxyhydroperoxide low-NO oxidation, *Environ. Sci. Technol.*, 49, 10330-10339, **2015**.
- 35 Kroll, J. H., Ng, N. L., Murphy, S. M., Flagan, R. C., and Seinfeld, J. H.: Secondary organic aerosol formation from isoprene photooxidation under high-NO<sub>x</sub> conditions, *Geophys. Res. Lett.*, 32, doi:10.1029/2005gl023637, **2005**.

- Kroll, J. H., Ng, N. L., Murphy, S. M., Flagan, R. C., and Seinfeld, J. H.: Secondary Organic Aerosol Formation from Isoprene Photooxidation, *Environ. Sci. Technol.*, 40, 1869-1877, doi:10.1021/es0524301, **2006**.
- Kroll, J. H., and Seinfeld, J. H.: Chemistry of secondary organic aerosol: Formation and evolution of low-volatility organics in the atmosphere, *Atmos. Environ.*, 42, 3593-3624, doi:10.1016/j.atmosenv.2008.01.003, **2008**.
- 5 Lee, A. K. Y., Zhao, R., Li, R., Liggio, J., Li, S.-M., and Abbatt, J. P. D.: Formation of Light Absorbing Organonitrogen Species from Evaporation of Droplets Containing Glyoxal and Ammonium Sulfate, *Environ. Sci. Technol.*, 47, 12819-12826, doi:10.1021/es402687w, **2013**.
- Lin, P., Yu, J. Z., Engling, G., and Kalberer, M.: Organosulfates in humic-like substance fraction isolated from aerosols at seven locations in East Asia: A study by ultra-high-resolution mass spectrometry, *Environ. Sci. Technol.*, 46, 13118-13127, **2012**.
- 10 Liu, J., D'Ambro, E. L., Lee, B. H., Lopez-Hilfiker, F. D., Zaveri, R. A., Rivera-Rios, J. C., Keutsch, F. N., Iyer, S., Kurten, T., and Zhang, Z.: Efficient isoprene secondary organic aerosol formation from a non-IEPOX pathway, *Environ. Sci. Technol.*, 50, 9872-9880, **2016a**.
- Liu, Y., Kuwata, M., McKinney, K. A., and Martin, S. T.: Uptake and release of gaseous species accompanying the reactions of isoprene photo-oxidation products with sulfate particles, *Phys. Chem. Chem. Phys.*, 18, 1595-1600, doi:10.1039/C5CP04551G, **2016b**.
- 15 Lopez-Hilfiker, F. D., Mohr, C., D'Ambro, E. L., Lutz, A., Riedel, T. P., Gaston, C. J., Iyer, S., Zhang, Z., Gold, A., Surratt, J. D., Lee, B. H., Kurten, T., Hu, W. W., Jimenez, J., Hallquist, M., and Thornton, J. A.: Molecular Composition and Volatility of Organic Aerosol in the Southeastern U.S.: Implications for IEPOX Derived SOA, *Environ. Sci. Technol.*, 50, 2200-2209, doi:10.1021/acs.est.5b04769, **2016**.
- 20 Marais, E. A., Jacob, D. J., Jimenez, J. L., Campuzano-Jost, P., Day, D. A., Hu, W., Krechmer, J., Zhu, L., Kim, P. S., Miller, C. C., Fisher, J. A., Travis, K., Yu, K., Hanisco, T. F., Wolfe, G. M., Arkinson, H. L., Pye, H. O. T., Froyd, K. D., Liao, J., and McNeill, V. F.: Aqueous-phase mechanism for secondary organic aerosol formation from isoprene: application to the southeast United States and co-benefit of SO<sub>2</sub> emission controls, *Atmos. Chem. Phys.*, 16, 1603-1618, doi:10.5194/acp-16-1603-2016, **2016**.
- 25 McNeill, V. F.: Aqueous Organic Chemistry in the Atmosphere: Sources and Chemical Processing of Organic Aerosols, *Environ. Sci. Technol.*, 49, 1237-1244, doi:10.1021/es5043707, **2015**.
- Ng, N. L., Kroll, J. H., Keywood, M. D., Bahreini, R., Varutbangkul, V., Flagan, R. C., Seinfeld, J. H., Lee, A., and Goldstein, A. H.: Contribution of First- versus Second-Generation Products to Secondary Organic Aerosols Formed in the Oxidation of Biogenic Hydrocarbons, *Environ. Sci. Technol.*, 40, 2283-2297, doi:10.1021/es052269u, **2006**.
- 30 Nguyen, T. B., Coggon, M. M., Bates, K. H., Zhang, X., Schwantes, R. H., Schilling, K. A., Loza, C. L., Flagan, R. C., Wennberg, P. O., and Seinfeld, J. H.: Organic aerosol formation from the reactive uptake of isoprene epoxydiols (IEPOX) onto non-acidified inorganic seeds, *Atmos. Chem. Phys.*, 14, 3497-3510, doi:10.5194/acp-14-3497-2014, **2014**.
- 35

- Nguyen, T. B., Crouse, J. D., Teng, A. P., St. Clair, J. M., Paulot, F., Wolfe, G. M., and Wennberg, P. O.: Rapid deposition of oxidized biogenic compounds to a temperate forest, *Proc. Natl Acad. Sci. U.S.A.*, 112, E392-E401, doi:10.1073/pnas.1418702112, **2015**.
- 5 Ortiz-Montalvo, D. L., Lim, Y. B., Perri, M. J., Seitzinger, S. P., and Turpin, B. J.: Volatility and Yield of Glycolaldehyde SOA Formed through Aqueous Photochemistry and Droplet Evaporation, *Aerosol Sci. Technol.*, 46, 1002-1014, doi:10.1080/02786826.2012.686676, **2012**.
- Ortiz-Montalvo, D. L., Häkkinen, S. A. K., Schwier, A. N., Lim, Y. B., McNeill, V. F., and Turpin, B. J.: Ammonium Addition (and Aerosol pH) Has a Dramatic Impact on the Volatility and Yield of Glyoxal Secondary Organic Aerosol, *Environ. Sci. Technol.*, 48, 255-262, doi:10.1021/es4035667, **2014**.
- 10 Palmer, P. I., Jacob, D. J., Fiore, A. M., Martin, R. V., Chance, K., and Kurosu, T. P.: Mapping isoprene emissions over North America using formaldehyde column observations from space, *J. Geophys. Res.-Atmospheres*, 108, doi:10.1029/2002jd002153, **2003**.
- Pankow, J. F.: Organic particulate material levels in the atmosphere: Conditions favoring sensitivity to varying relative humidity and temperature, *Proc. Natl Acad. Sci. U.S.A.*, 107, 6682-6686, doi:10.1073/pnas.1001043107, **2010**.
- 15 Pankow, J. F., Marks, M. C., Barsanti, K. C., Mahmud, A., Asher, W. E., Li, J., Ying, Q., Jathar, S. H., and Kleeman, M. J.: Molecular view modeling of atmospheric organic particulate matter: Incorporating molecular structure and co-condensation of water, *Atmos. Environ.*, 122, 400-408, **2015**.
- Paulot, F., Crouse, J. D., Kjaergaard, H. G., Kürten, A., St. Clair, J. M., Seinfeld, J. H., and Wennberg, P. O.: Unexpected Epoxide Formation in the Gas-Phase Photooxidation of Isoprene, *Science*, 325, 730, **2009**.
- 20 Pfister, G. G., Emmons, L. K., Hess, P. G., Lamarque, J. F., Orlando, J. J., Walters, S., Guenther, A., Palmer, P. I., and Lawrence, P. J.: Contribution of isoprene to chemical budgets: A model tracer study with the NCAR CTM MOZART-4, *J. Geophys. Res.-Atmospheres*, 113, **2008**.
- Pruppacher, H. R.: The Role of Cloudphysics in Atmospheric Multiphase Systems: Ten Basic Statements, in: *Chemistry of Multiphase Atmospheric Systems*, edited by: Jaeschke, W., Springer Berlin Heidelberg, Berlin, Heidelberg, 133-190, **1986**.
- Psichoudaki, M., and Pandis, S. N.: Atmospheric Aerosol Water-Soluble Organic Carbon Measurement: A Theoretical Analysis, *Environ. Sci. Technol.*, 47, 9791-9798, doi:10.1021/es402270y, **2013**.
- Pye, H. O. T., Pinder, R. W., Piletic, I. R., Xie, Y., Capps, S. L., Lin, Y.-H., Surratt, J. D., Zhang, Z., Gold, A., Luecken, D. J., Hutzell, W. T., Jaoui, M., Offenberg, J. H., Kleindienst, T. E., Lewandowski, M., and Edney, E. O.: Epoxide Pathways Improve Model Predictions of Isoprene Markers and Reveal Key Role of Acidity in Aerosol Formation, *Environ. Sci. Technol.*, 47, 11056-11064, doi:10.1021/es402106h, **2013**.
- 30 Pye, H. O. T., Murphy, B. N., Xu, L., Ng, N. L., Carlton, A. G., Guo, H., Weber, R., Vasilakos, P., Appel, K. W., Budisulistiorini, S. H., Surratt, J. D., Nenes, A., Hu, W., Jimenez, J. L., Isaacman-VanWertz, G., Misztal, P. K., and Goldstein, A. H.: On the implications of aerosol liquid water and phase separation for organic aerosol mass, *Atmos. Chem. Phys.*, 17, 343-369, doi:10.5194/acp-17-343-2017, **2017**.
- 35

- Riedel, T. P., Lin, Y.-H., Budisulistiorini, S. H., Gaston, C. J., Thornton, J. A., Zhang, Z., Vizuete, W., Gold, A., and Surratt, J. D.: Heterogeneous Reactions of Isoprene-Derived Epoxides: Reaction Probabilities and Molar Secondary Organic Aerosol Yield Estimates, *Environ. Sci. Technol. Lett.*, 2, 38-42, doi:10.1021/ez500406f, **2015**.
- 5 Riva, M., Budisulistiorini, S. H., Chen, Y., Zhang, Z., D'Ambro, E. L., Zhang, X., Gold, A., Turpin, B. J., Thornton, J. A., Canagaratna, M. R., and Surratt, J. D.: Chemical Characterization of Secondary Organic Aerosol from Oxidation of Isoprene Hydroxyhydroperoxides, *Environ. Sci. Technol.*, 50, 9889-9899, doi:10.1021/acs.est.6b02511, **2016**.
- Riva, M., Budisulistiorini, S. H., Zhang, Z., Gold, A., Thornton, J. A., Turpin, B. J., and Surratt, J. D.: Multiphase reactivity of gaseous hydroperoxide oligomers produced from isoprene ozonolysis in the presence of acidified aerosols, *Atmos. Environ.*, 152, 314-322, **2017**.
- 10 Saha, P. K., Khlystov, A., Yahya, K., Zhang, Y., Xu, L., Ng, N. L., and Grieshop, A. P.: Quantifying the volatility of organic aerosol in the southeastern US, *Atmos. Chem. Phys.*, 17, 501-520, doi:10.5194/acp-17-501-2017, **2017**.
- Sander, R.: Compilation of Henry's law constants (version 4.0) for water as solvent, *Atmos. Chem. Phys.*, 15, 4399-4981, doi:10.5194/acp-15-4399-2015, **2015**.
- 15 Sanderson, M. G., Jones, C. D., Collins, W. J., Johnson, C. E., and Derwent, R. G.: Effect of climate change on isoprene emissions and surface ozone levels, *Geophysical Research Letters*, 30, doi:10.1029/2003gl017642, **2003**.
- Sareen, N., Waxman, E. M., Turpin, B. J., Volkamer, R., and Carlton, A. G.: Potential of Aerosol Liquid Water to Facilitate Organic Aerosol Formation: Assessing Knowledge Gaps about Precursors and Partitioning, *Environ. Sci. Technol.*, 51, 3327-3335, doi:10.1021/acs.est.6b04540, **2017**.
- 20 Seinfeld, J. H., and Pankow, J. F.: Organic atmospheric particulate material, *Annual review of physical chemistry*, 54, 121-140, **2003**.
- Spaulding, R. S., Talbot, R. W., and Charles, M. J.: Optimization of a Mist Chamber (Cofer Scrubber) for Sampling Water-Soluble Organics in Air, *Environ. Sci. Technol.*, 36, 1798-1808, doi:10.1021/es011189x, **2002**.
- Sullivan, A. P., Weber, R. J., Clements, A. L., Turner, J. R., Bae, M. S., and Schauer, J. J.: A method for on-line measurement of water-soluble organic carbon in ambient aerosol particles: Results from an urban site, *Geophys. Res. Lett.*, 31, doi:10.1029/2004gl019681, **2004**.
- 25 Sun, Y. L., Zhang, Q., Schwab, J. J., Demerjian, K. L., Chen, W. N., Bae, M. S., Hung, H. M., Hogrefe, O., Frank, B., Rattigan, O. V., and Lin, Y. C.: Characterization of the sources and processes of organic and inorganic aerosols in New York city with a high-resolution time-of-flight aerosol mass spectrometer, *Atmos. Chem. Phys.*, 11, 1581-1602, doi:10.5194/acp-11-1581-2011, **2011**.
- 30 Surratt, J. D., Murphy, S. M., Kroll, J. H., Ng, N. L., Hildebrandt, L., Sorooshian, A., Szmigielski, R., Vermeylen, R., Maenhaut, W., Claeys, M., Flagan, R. C., and Seinfeld, J. H.: Chemical Composition of Secondary Organic Aerosol Formed from the Photooxidation of Isoprene, *J. Phys. Chem. A*, 110, 9665-9690, doi:10.1021/jp061734m, **2006**.
- 35 Surratt, J. D., Chan, A. W. H., Eddingsaas, N. C., Chan, M., Loza, C. L., Kwan, A. J., Hersey, S. P., Flagan, R. C., Wennberg, P. O., and Seinfeld, J. H.: Reactive intermediates revealed in secondary organic aerosol formation from isoprene, *Proc. Natl Acad. Sci. U.S.A.*, 107, 6640-6645, doi:10.1073/pnas.0911114107, **2010**.

- Timonen, H., Carbone, S., Aurela, M., Saarnio, K., Saarikoski, S., Ng, N. L., Canagaratna, M. R., Kulmala, M., Kerminen, V.-M., Worsnop, D. R., and Hillamo, R.: Characteristics, sources and water-solubility of ambient submicron organic aerosol in springtime in Helsinki, Finland, *J. Aerosol Sci.*, 56, 61-77, doi:10.1016/j.jaerosci.2012.06.005, **2013**.
- 5 Travis, K. R., Jacob, D. J., Fisher, J. A., Kim, P. S., Marais, E. A., Zhu, L., Yu, K., Miller, C. C., Yantosca, R. M., Sulprizio, M. P., Thompson, A. M., Wennberg, P. O., Crounse, J. D., St. Clair, J. M., Cohen, R. C., Laughner, J. L., Dibb, J. E., Hall, S. R., Ullmann, K., Wolfe, G. M., Pollack, I. B., Peischl, J., Neuman, J. A., and Zhou, X.: Why do models overestimate surface ozone in the Southeast United States?, *Atmos. Chem. Phys.*, 16, 13561-13577, doi:10.5194/acp-16-13561-2016, **2016**.
- 10 Weber, R. J., Sullivan, A. P., Peltier, R. E., Russell, A., Yan, B., Zheng, M., de Gouw, J., Warneke, C., Brock, C., Holloway, J. S., Atlas, E. L., and Edgerton, E.: A study of secondary organic aerosol formation in the anthropogenic-influenced southeastern United States, *J. Geophys. Res.-Atmospheres*, 112, doi:10.1029/2007jd008408, **2007**.
- Weber, R. J., Guo, H., Russell, A. G., and Nenes, A.: High aerosol acidity despite declining atmospheric sulfate concentrations over the past 15 years, *Nature Geoscience*, 9, 282-285, **2016**.
- 15 Wong, J. P. S., Lee, A. K. Y., and Abbatt, J. P. D.: Impacts of Sulfate Seed Acidity and Water Content on Isoprene Secondary Organic Aerosol Formation, *Environ. Sci. Technol.*, 49, 13215-13221, doi:10.1021/acs.est.5b02686, **2015**.
- Xu, L., Kollman, M. S., Song, C., Shilling, J. E., and Ng, N. L.: Effects of NO<sub>x</sub> on the Volatility of Secondary Organic Aerosol from Isoprene Photooxidation, *Environ. Sci. Technol.*, 48, 2253-2262, doi:10.1021/es404842g, **2014**.
- 20 Xu, L., Guo, H., Boyd, C. M., Klein, M., Bougiatioti, A., Cerully, K. M., Hite, J. R., Isaacman-VanWertz, G., Kreisberg, N. M., Knote, C., Olson, K., Koss, A., Goldstein, A. H., Hering, S. V., de Gouw, J., Baumann, K., Lee, S.-H., Nenes, A., Weber, R. J., and Ng, N. L.: Effects of anthropogenic emissions on aerosol formation from isoprene and monoterpenes in the southeastern United States, *Proc. Natl Acad. Sci. U.S.A.*, 112, 37-42, doi:10.1073/pnas.1417609112, **2015**.
- 25 Xu, L., Guo, H., Weber, R. J., and Ng, N. L.: Chemical characterization of water-soluble organic aerosol in contrasting rural and urban environments in the southeastern United States, *Environ. Sci. Technol.*, 51, 78-88, **2016**.
- 30 Xu, L., Guo, H., Weber, R. J., and Ng, N. L.: Chemical Characterization of Water-Soluble Organic Aerosol in Contrasting Rural and Urban Environments in the Southeastern United States, *Environ. Sci. Technol.*, 51, 78-88, doi:10.1021/acs.est.6b05002, **2017a**.
- Xu, W., Han, T., Du, W., Wang, Q., Chen, C., Zhao, J., Zhang, Y., Li, J., Fu, P., Wang, Z., Worsnop, D. R., and Sun, Y.: Effects of Aqueous-Phase and Photochemical Processing on Secondary Organic Aerosol Formation and Evolution in Beijing, China, *Environ. Sci. Technol.*, 51, 762-770, doi:10.1021/acs.est.6b04498, **2017b**.
- 35 Ying, Q., Li, J., and Kota, S. H.: Significant Contributions of Isoprene to Summertime Secondary Organic Aerosol in Eastern United States, *Environ. Sci. Technol.*, 49, 7834-7842, doi:10.1021/acs.est.5b02514, **2015**.

- Yu, K., Jacob, D. J., Fisher, J. A., Kim, P. S., Marais, E. A., Miller, C. C., Travis, K. R., Zhu, L., Yantosca, R. M., Sulprizio, M. P., Cohen, R. C., Dibb, J. E., Fried, A., Mikoviny, T., Ryerson, T. B., Wennberg, P. O., and Wisthaler, A.: Sensitivity to grid resolution in the ability of a chemical transport model to simulate observed oxidant chemistry under high-isoprene conditions, *Atmos. Chem. Phys.*, 16, 4369-4378, doi:10.5194/acp-16-4369-2016, **2016**.
- 5
- Zhang, X., Liu, Z., Hecobian, A., Zheng, M., Frank, N. H., Edgerton, E. S., and Weber, R. J.: Spatial and seasonal variations of fine particle water-soluble organic carbon (WSOC) over the southeastern United States: implications for secondary organic aerosol formation, *Atmos. Chem. Phys.*, 12, 6593-6607, doi:10.5194/acp-12-6593-2012, **2012**.
- 10
- Zhang, Y. J., Tang, L. L., Sun, Y. L., Favez, O., Canonaco, F., Albinet, A., Couvidat, F., Liu, D. T., Jayne, J. T., Wang, Z., Croteau, P. L., Canagaratna, M. R., Zhou, H. C., Prevot, A. S. H., and Worsnop, D. R.: Limited formation of isoprene epoxydiols-derived secondary organic aerosol under NO<sub>x</sub>-rich environments in Eastern China, *Geophys. Res. Lett.*, 44, 2035-2043, doi:10.1002/2016gl072368, **2017**.

**Table 1.** Seasonal sampling periods in Baltimore, MD.

| <b>Season</b>       | <b>Sampling Period</b>     |
|---------------------|----------------------------|
| <b>Fall</b>         | 3 – 30 September 2014      |
| <b>Winter</b>       | 4 February – 23 March 2015 |
| <b>Early spring</b> | 23 April – 8 May 2015      |
| <b>Late spring</b>  | 9 May – 14 May 2015        |
| <b>Summer</b>       | 6 July – 14 August 2015    |



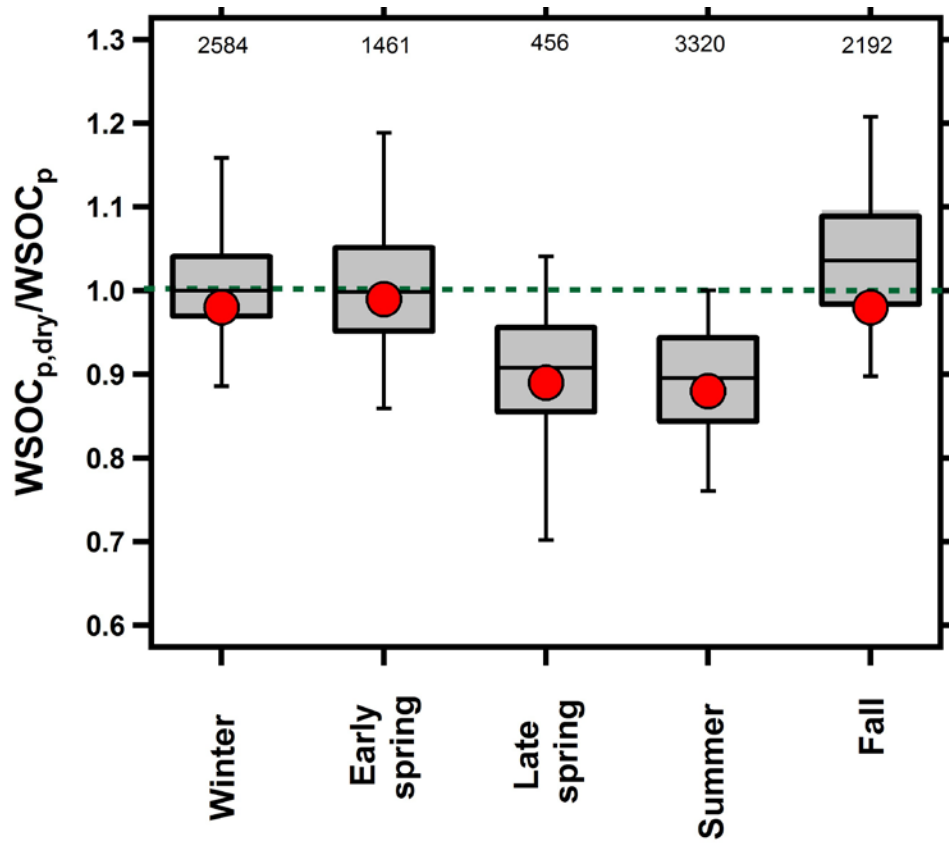

**Figure 1:** Boxplot of the overall seasonal  $WSOC_{p,dry}/WSOC_p$  ratios. For each bin, mean (red marker), median (horizontal black line), 25<sup>th</sup> and 75<sup>th</sup> percentiles (lower and upper box values), as well as 5<sup>th</sup> and 95<sup>th</sup> percentiles (vertical lines) are shown. The dotted green line at unity is shown for visual reference. Numbers at the top represent the number of paired  $WSOC_{p,dry}/WSOC_p$  measurements within each season.

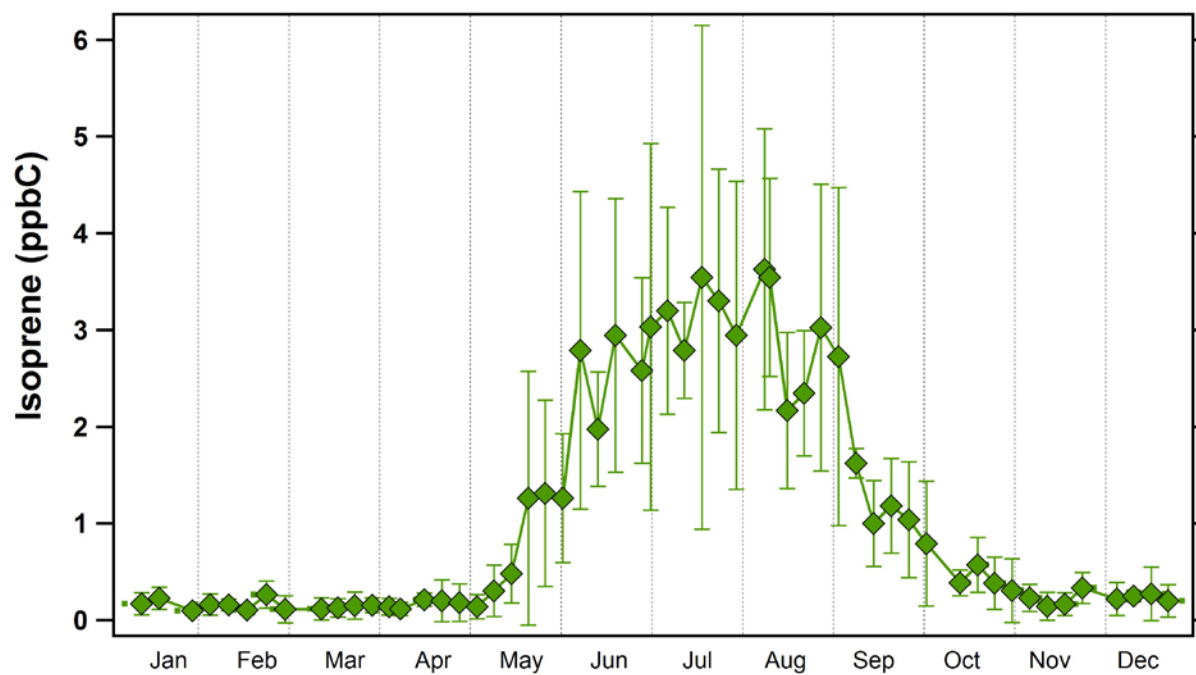

**Figure 2:** Annual climatology of isoprene concentrations in Essex, MD (2011 to 2015). Symbols represent average concentrations (in ppbC or  $\text{nmol mol}^{-1}$ ) while error bars represent  $\pm 1\sigma$ .

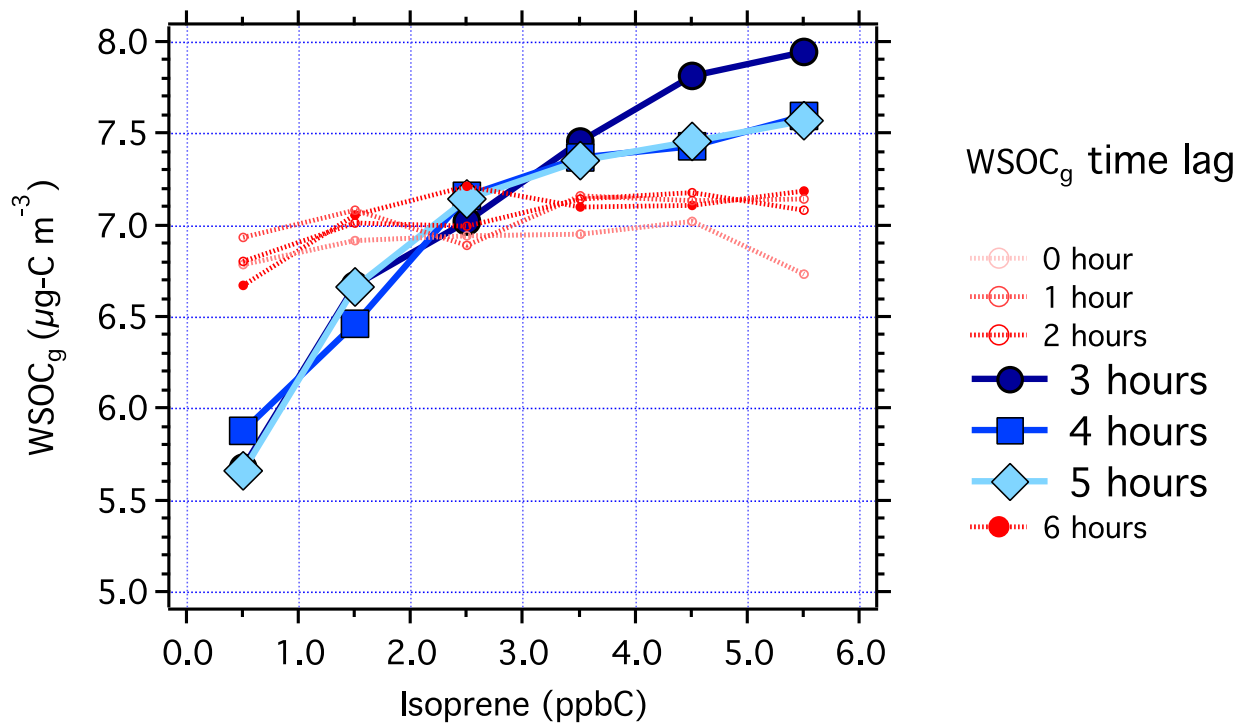

**Figure 3:** Median WSOC<sub>g</sub> concentrations as a function of isoprene concentrations at different WSOC<sub>g</sub> time lags during the summer. The following isoprene concentrations bins were defined: < 1 ppbC, (1 to 2) ppbC, (2 to 3) ppbC, (3 to 4) ppbC, (4 to 5) ppbC, and > 5 ppbC. Scatter and box plots showing individual data are presented in Fig. S6.

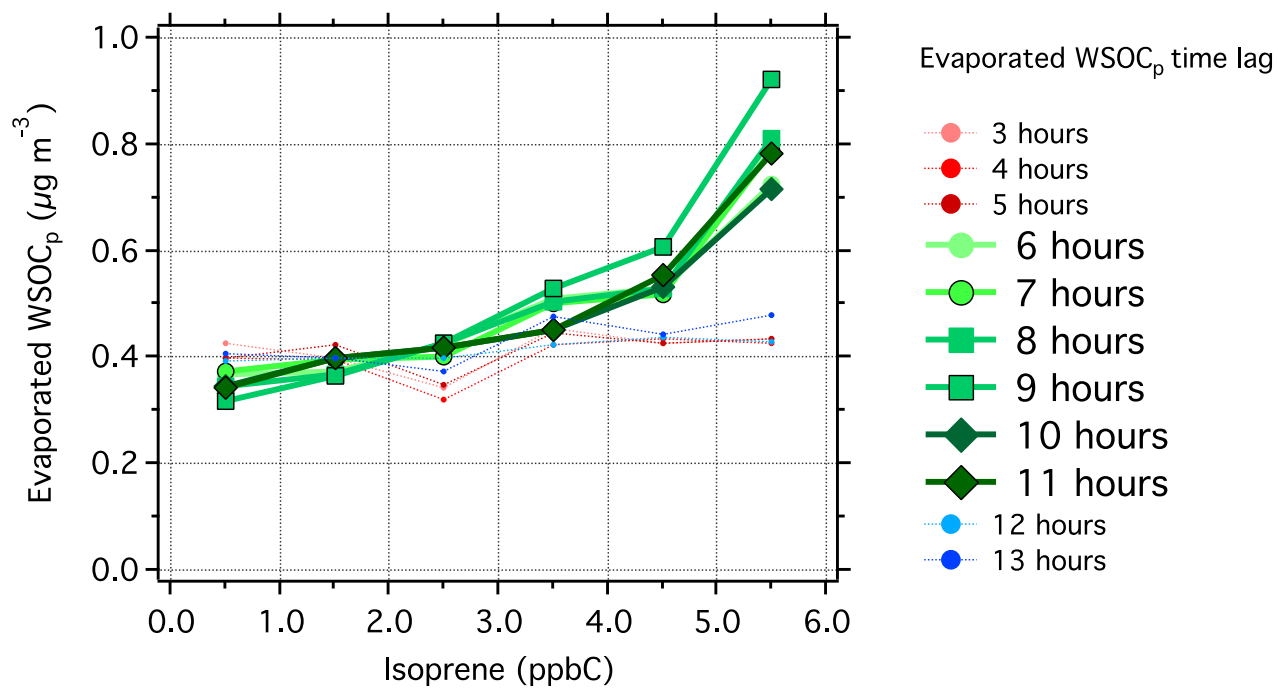

**Figure 4:** Median evaporated WSOC<sub>p</sub> concentrations as a function of isoprene concentrations at different evaporated WSOC<sub>p</sub> time lags during the summer. Scatter and box plots showing individual data are presented in Fig. S6.

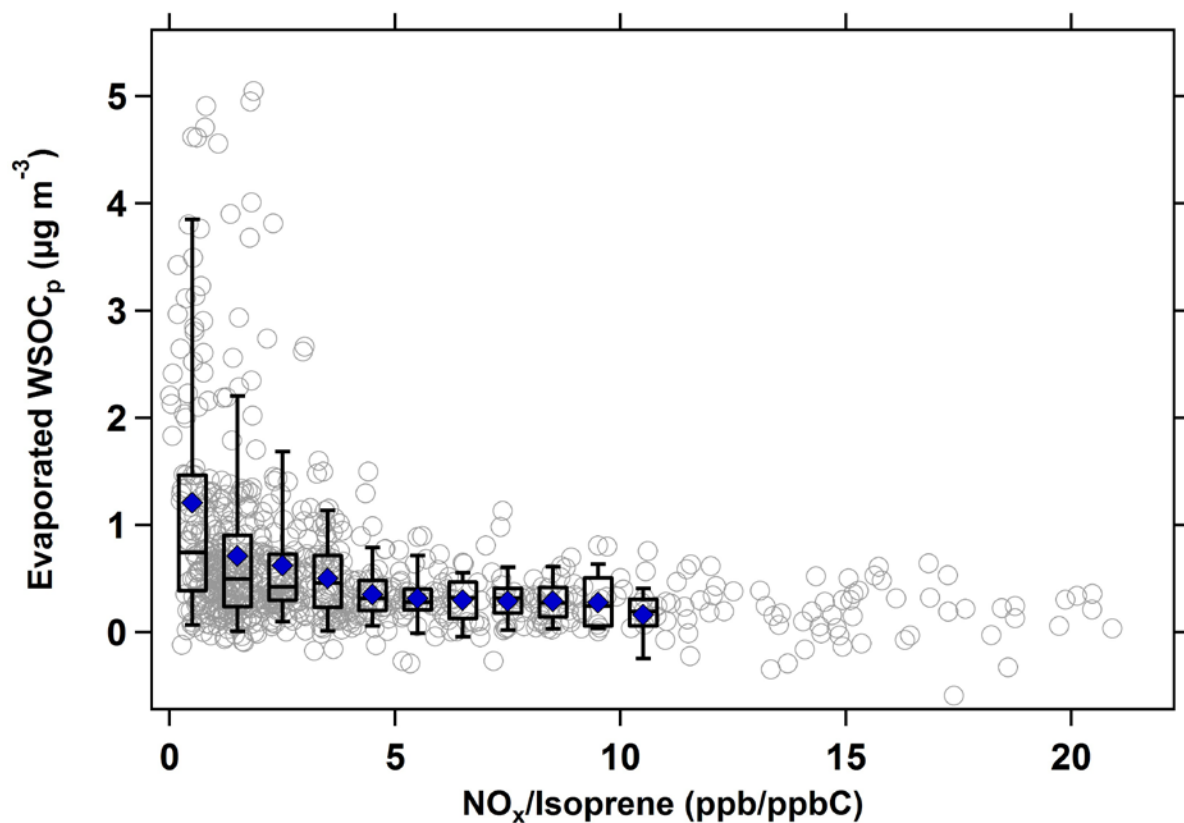

**Figure 5:** Scatter and box plots of evaporated  $\text{WSOC}_p$  (9 h time lag) as a function of  $\text{NO}_x$ /isoprene ratio in the summer. Bins were defined: (0 to 1) ppb/ppb-C (0 to 1 mol/mol C), (1 to 2) ppb/ppb-C, (2 to 3) ppb/ppb-C, (3 to 4) ppb/ppb-C, (4 to 5) ppb/ppb-C, (5 to 6) ppb/ppb-C, (6 to 7) ppb/ppb-C, (7 to 8) ppb/ppb-C, (8 to 9) ppb/ppb-C, (9 to 10) ppb/ppb-C, > 10 ppb/ppb-C. Bins were chosen to include at least 50 datapoints. For each bin, mean (blue marker), median (horizontal black line), 25<sup>th</sup> and 75<sup>th</sup> percentiles (lower and upper box values), as well as 5<sup>th</sup> and 95<sup>th</sup> percentiles (vertical lines) are shown.

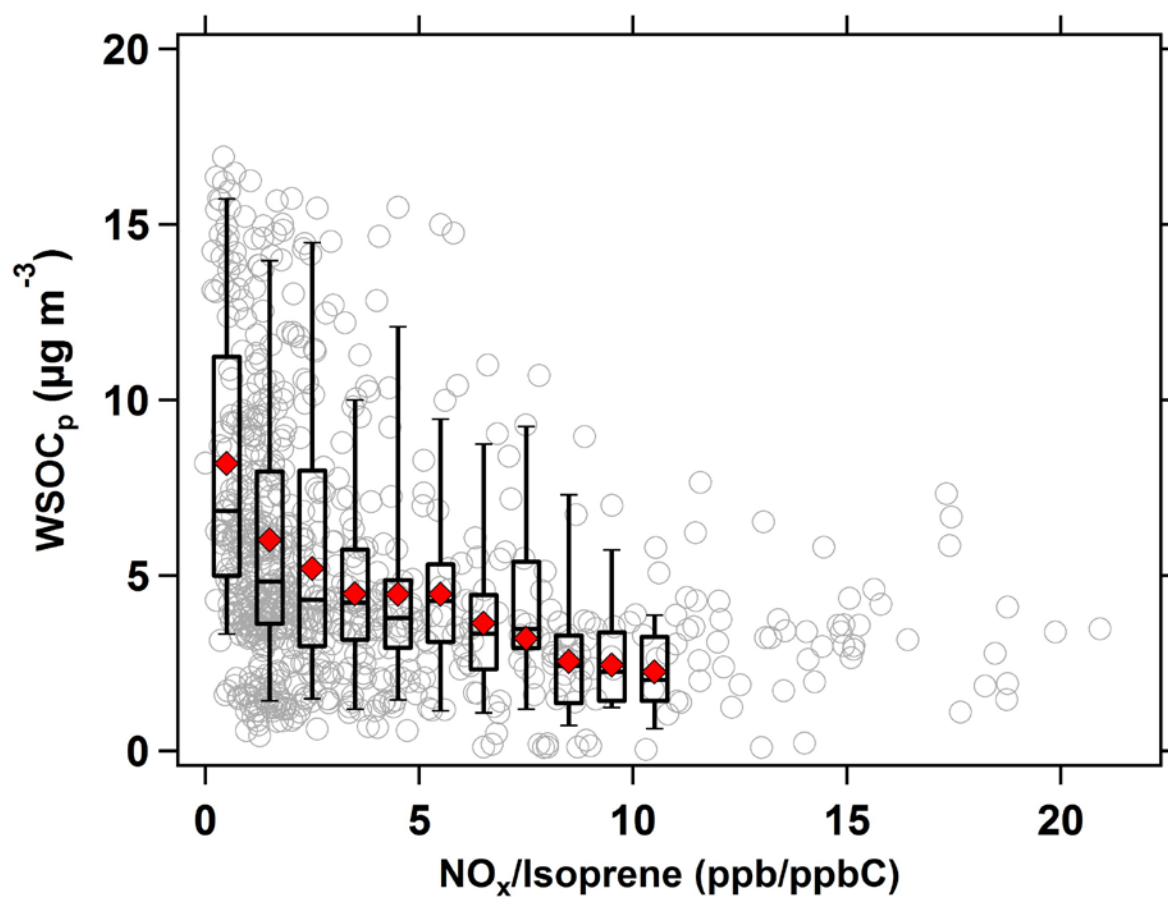

**Figure 6:** Scatter plot of WSOC<sub>p</sub> as a function of NO<sub>x</sub>/isoprene ratio in the summer. Symbols and bins are consistent with those defined in Fig. 5.

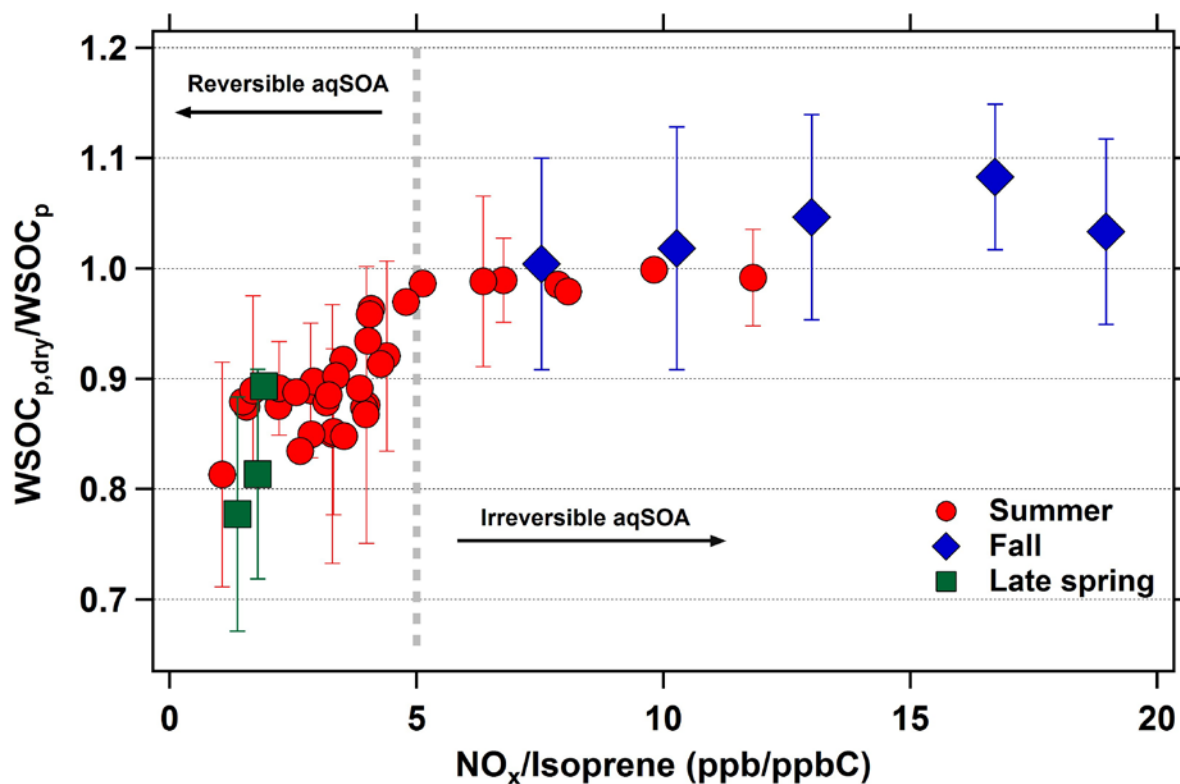

**Figure 7:** Daily average  $WSOC_{p,dry}/WSOC_p$  ratios as a function of daily average  $NO_x$ /isoprene ratios. Gray dotted line is representative of the transition zone from reversible to irreversible aqSOA conditions. Error bars represent  $\pm 1\sigma$ , and are shown for one-third of the data for clarity.



This supporting information is composed of eight pages, six figures and one table. Table S1 contains a comparison of ambient RH and RH sampled through the silica gel dryer in Baltimore across the different seasons. Figure S1 is a scatter plot of NO<sub>x</sub> concentrations measured at two different sites in the Baltimore region. Figure S2 presents seasonal daytime and nighttime WSOC<sub>p,dry</sub>/WSOC<sub>p</sub> ratios. Figure S3 depicts the summertime diurnal profiles of isoprene, and WSOC<sub>g</sub> concentrations shifted by 3 h. Figure S4 shows boxplots of WSOC<sub>p</sub> and evaporated WSOC<sub>p</sub> concentrations as a function of isoprene concentrations at 9 h time delay relative to isoprene concentrations. Figure S5 illustrates the median evaporated WSOC<sub>p</sub> concentrations as a function of WSOC<sub>g</sub> concentrations at different time delays relative to WSOC<sub>g</sub> concentrations, and a scatter and box plot corresponding to one time lag (4 h). Finally, Figure S6 shows scatter and boxplots of WSOC<sub>g</sub> and evaporated WSOC<sub>p</sub> concentrations as a function of isoprene concentrations at 3 h and 9-h time lags, respectively, during the summer.

**Table S1.** Comparison of ambient RH and RH sampled through the silica gel dryer across the different seasons.

| <b>Ambient RH<br/>(%)</b> | <b>RH-through dryer<br/>Mean <math>\pm</math> 1<math>\sigma</math> (%)</b> |                |                |                |
|---------------------------|----------------------------------------------------------------------------|----------------|----------------|----------------|
|                           | <b>Fall</b>                                                                | <b>Winter</b>  | <b>Spring</b>  | <b>Summer</b>  |
| 20                        |                                                                            |                | 10.7 $\pm$ 0.5 |                |
| 30                        |                                                                            |                | 19.8 $\pm$ 0.4 |                |
| 40                        |                                                                            |                | 21.1 $\pm$ 0.5 | 32.7 $\pm$ 0.7 |
| 50                        |                                                                            | 15.5 $\pm$ 0.2 | 16.5 $\pm$ 0.3 | 35.0 $\pm$ 0.9 |
| 60                        | 46.0 $\pm$ 0.7                                                             | 19.2 $\pm$ 0.8 | 31.4 $\pm$ 0.3 | 36.6 $\pm$ 0.4 |
| 70                        | 42.3 $\pm$ 1.9                                                             | 20.8 $\pm$ 0.7 | 32.0 $\pm$ 0.4 | 35.1 $\pm$ 0.1 |
| 80                        | 42.5 $\pm$ 0.5                                                             | 22.8 $\pm$ 0.9 | 22.5 $\pm$ 0.6 | 40.0 $\pm$ 0.1 |
| 90                        | 42.2 $\pm$ 1.2                                                             | 23.6 $\pm$ 0.8 |                |                |

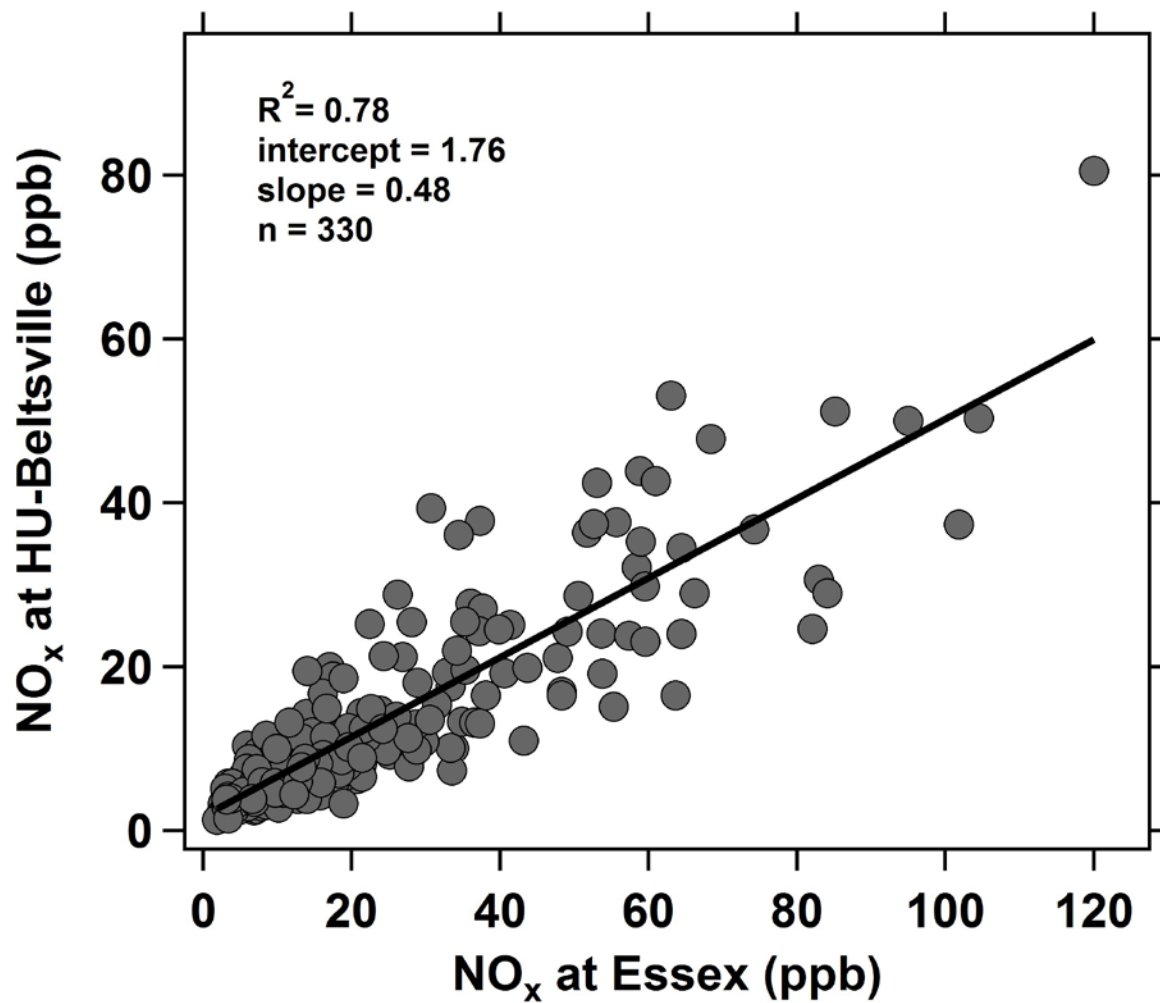

**Figure S1:** Scatter plot of daily average NO<sub>x</sub> concentrations (in ppb or nmol mol<sup>-1</sup>) at the HU-Beltsville and Essex sites for one year. The solid black line is the linear fit based on a least-squares regression analysis.

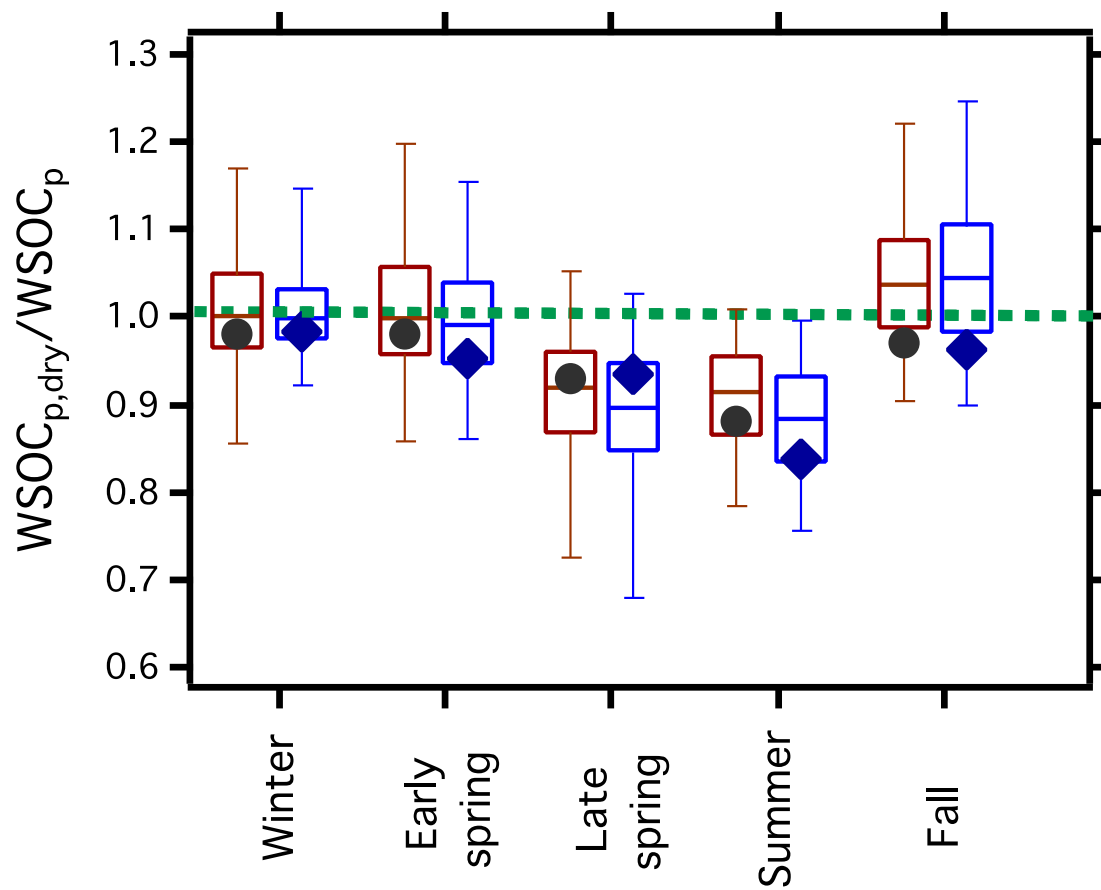

**Figure S2:** Daytime (brown) and nighttime (blue) seasonal  $WSOC_{p,dry}/WSOC_p$  ratios. Circles and diamonds represent the daytime and nighttime averages, respectively. The green dotted line at unity is for visual reference.

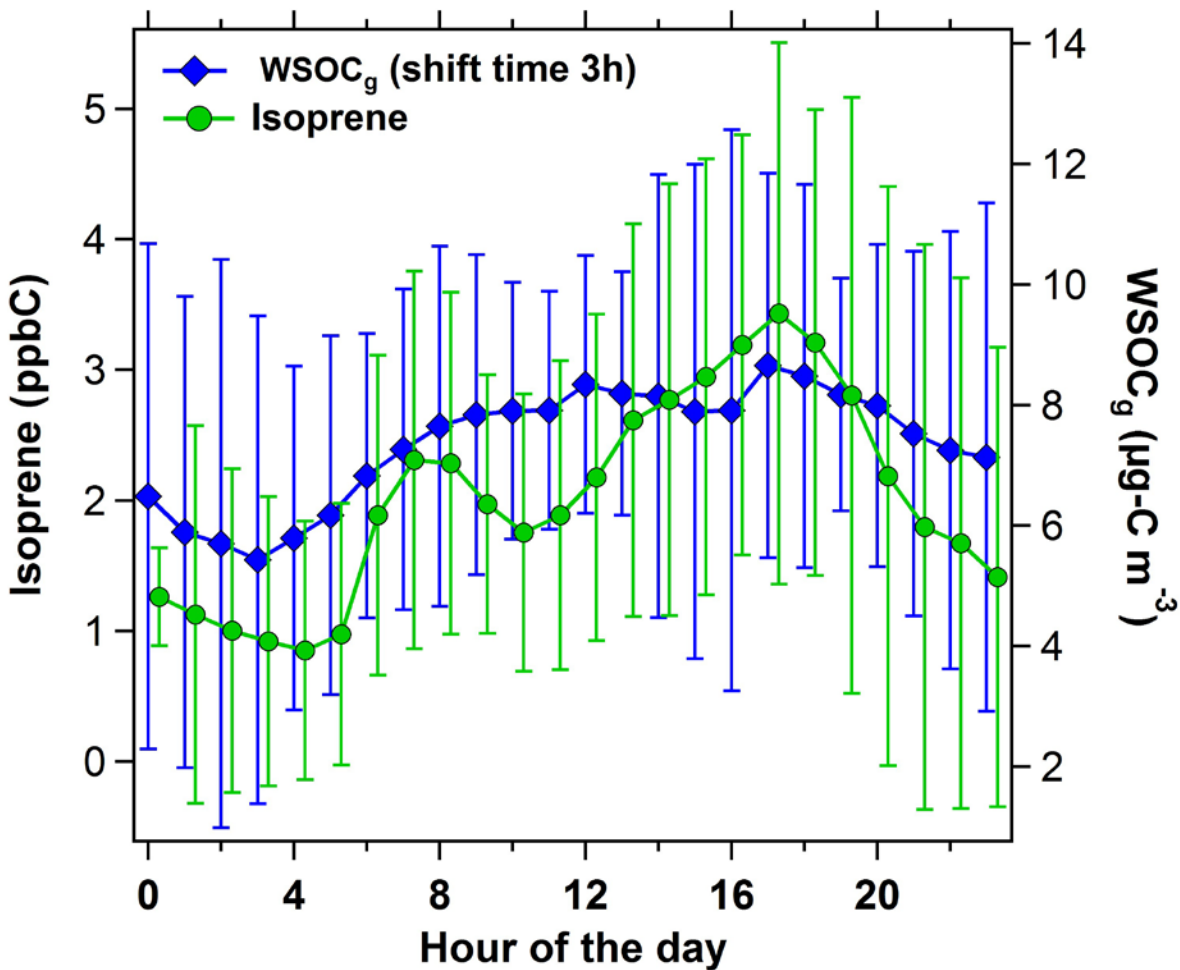

**Figure S3:** Summertime average diurnal profiles of isoprene concentrations (in ppbC or  $\text{nmol mol}^{-1}$ , green circles), and  $\text{WSOC}_g$  concentrations shifted 3 h prior to their measurement (blue diamonds). All concentrations pertain to the summer, ozone season (starting from early June until late August of 2015) when hourly isoprene measurements were available. Error bars represent  $\pm 1\sigma$ . The two series were offset by 0.3 h for clarity.

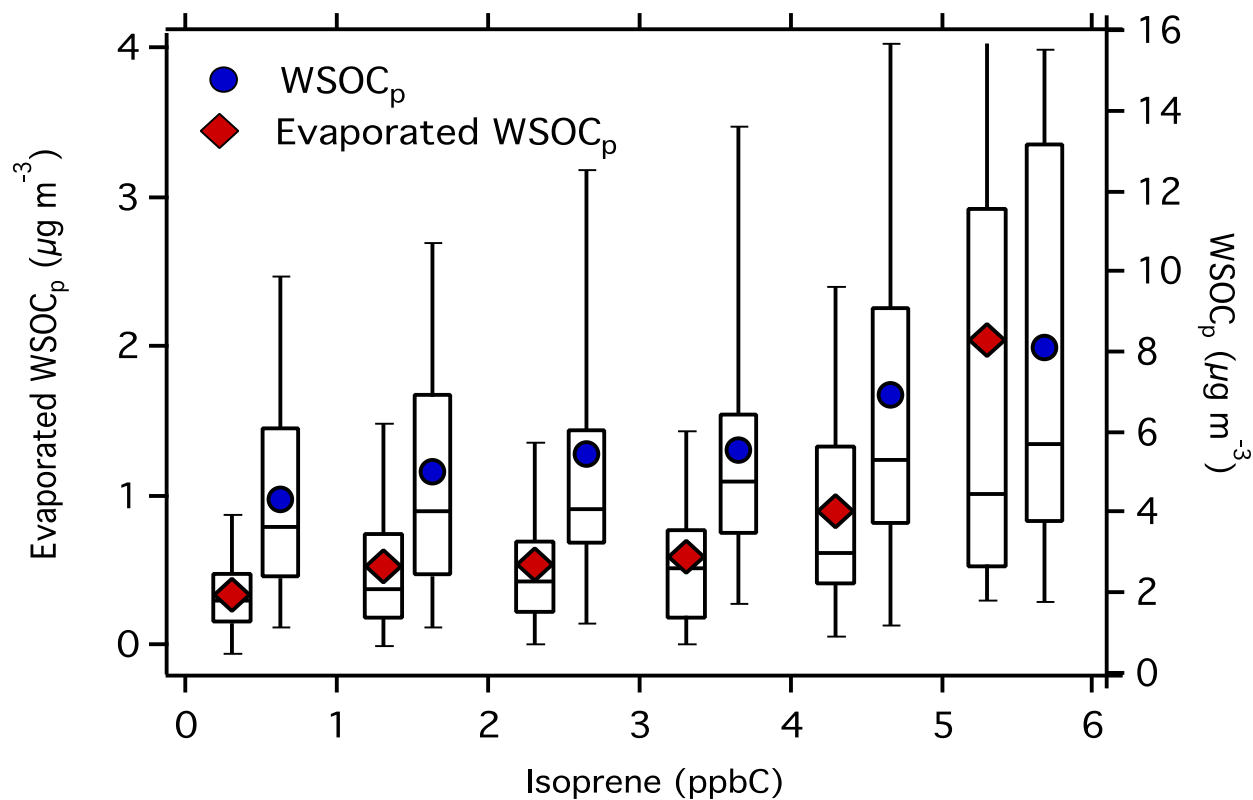

**Figure S4:** Boxplots of WSOC<sub>p</sub> and evaporated WSOC<sub>p</sub> concentrations as a function of isoprene concentrations (in ppbC or nmol mol<sup>-1</sup>) at 9 h time delay ( $n = 9$  h) relative to isoprene concentrations. Blue circles and red diamonds represent the means of the WSOC<sub>p</sub> and evaporated WSOC<sub>p</sub> concentrations at each isoprene bin, respectively. Note that the 95<sup>th</sup> percentile of the evaporated WSOC<sub>p</sub> concentration for the highest isoprene bin ( $> 5$  ppbC, or 5 nmol mol<sup>-1</sup>) is off scale ( $7.6 \mu\text{g m}^{-3}$ ).

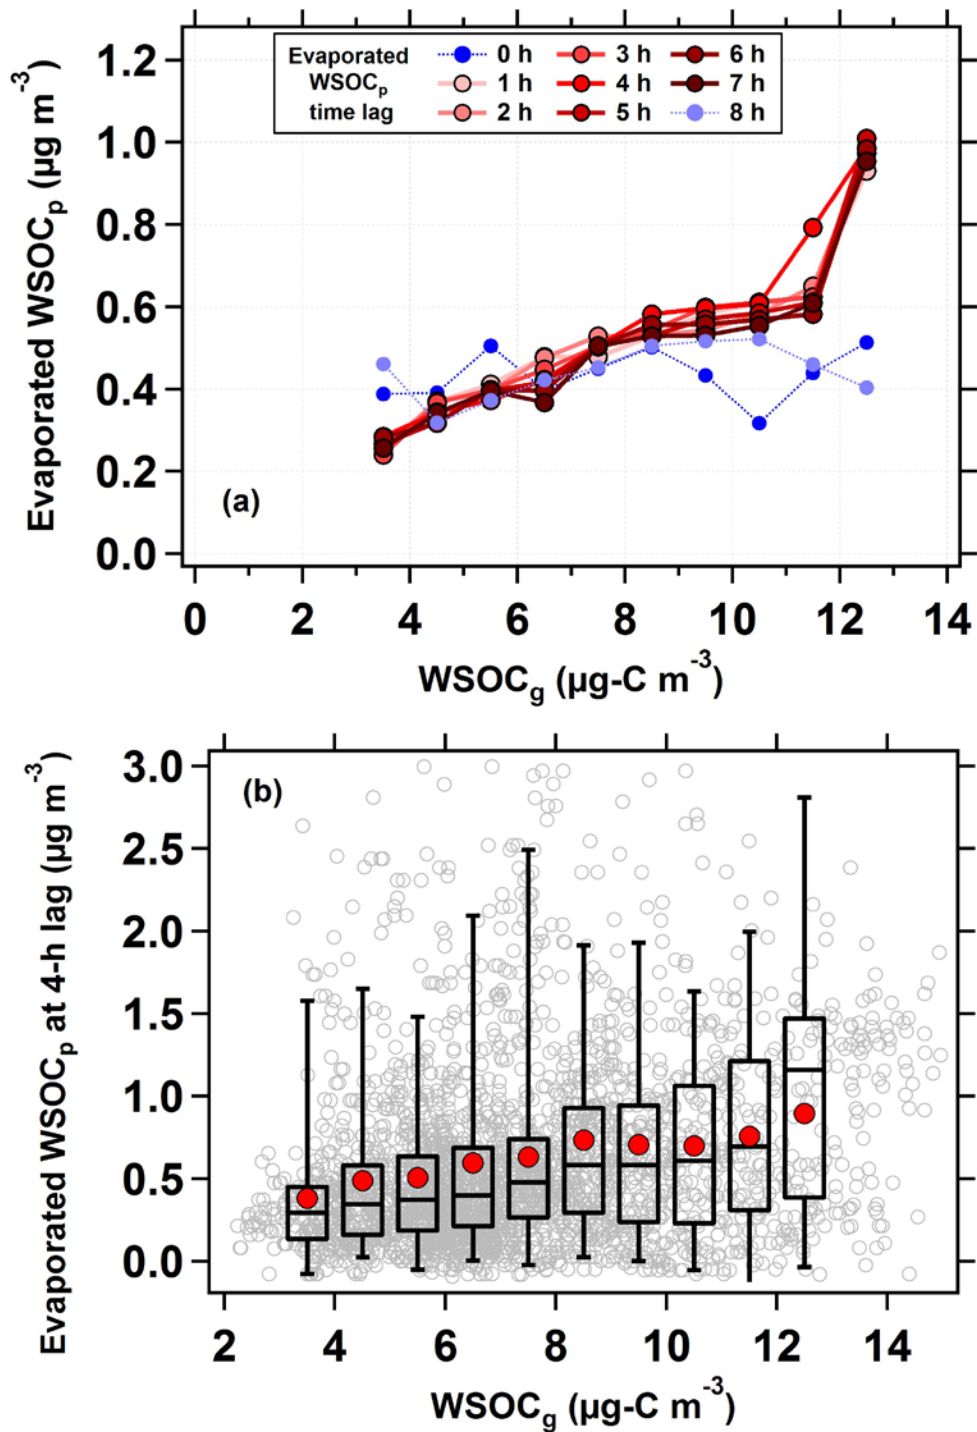

**Figure S5:** (a) Median evaporated  $WSOC_p$  concentrations as a function of  $WSOC_g$  concentrations at different time delays relative to the  $WSOC_g$  concentrations. (b) Scatter and box plot (median, inter quartile range, and 5<sup>th</sup> and 95<sup>th</sup> percentiles) of the evaporated  $WSOC_p$  concentration at 4-h time lag vs.  $WSOC_g$ . Red circles represent the mean of each bin. Note that approximately 2% of the individual measurements are off scale.



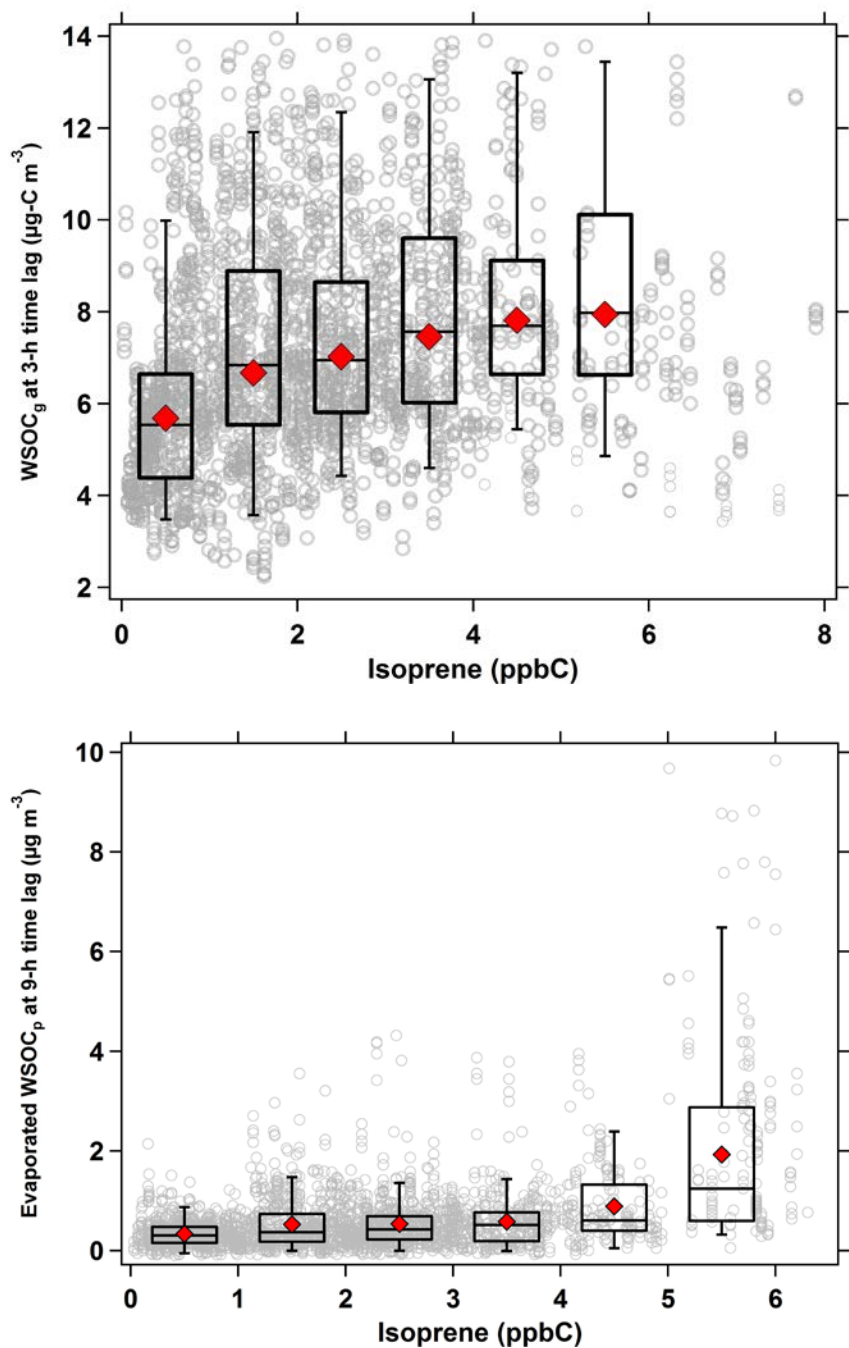

**Figure S6:** Scatter and boxplot of  $\text{WSOC}_g$  concentrations with a 3-h time lag (top) and the evaporated  $\text{WSOC}_p$  concentrations with 9-h time lag (bottom) as a function of isoprene concentrations (in ppbC, or  $\text{nmol mol}^{-1}$ ) during the summer. The following isoprene concentrations bins were defined:  $< 1$ ,  $1 - 2$ ,  $2 - 3$ ,  $3 - 4$ ,  $4 - 5$ , and  $> 5$  ppbC ( $\text{nmol mol}^{-1}$ ). For each bin, mean (red marker), median (horizontal black line), 25<sup>th</sup> and 75<sup>th</sup> percentiles (lower and upper box values), as well as 5<sup>th</sup> and 95<sup>th</sup> percentiles (vertical lines) are shown. Note  $\approx 1\%$  of the data are off scale in each figure.
